# Supplementary material for: Protonated N′-benzyl-N′-prolyl proline hydrazide as highly enantioselective catalyst for direct asymmetric aldol reaction
Source: Royal Society of Chemistry journal article supplement (doi:10.1039/b511992h), 2005-11-18
Supplement: b511992h.pdf [file b511992h.pdf]

**Supplementary data**

**Protonated N'-benzyl-N'-propyl Proline Hydrazide as Highly Enantioselective Catalyst for Direct Asymmetric Aldol Reaction**

**Chuanling Cheng,<sup>a,d,e</sup> Jian Sun,<sup>\*a</sup> Chao Wang,<sup>a,e</sup> Yu Zhang,<sup>a,c</sup> Siyu Wei,<sup>a</sup> Fan Jiang<sup>b</sup> and Yundong Wu<sup>\*b,c</sup>**

<sup>a</sup> Chengdu Institute of Biology, Chinese Academy of Sciences, Chengdu 610041, China. Fax: +86-28-85222753; Tel: +86-28-85211220; E-mail: sunjian@cib.ac.cn

<sup>b</sup> College of Chemistry, Peking University, Beijing, 100871, China;

<sup>c</sup> Department of chemistry, The Hong Kong University of Science and Technology, Kowloon, Hong Kong, China;

<sup>d</sup> Chengdu Institute of Organic Chemistry, Chinese Academy of Sciences, Chengdu 610041;

<sup>e</sup> Graduate School of Chinese Academy of Sciences, Beijing, China

*sunjian@cib.ac.cn*

| <b>Table of Contents</b>                                                                                            | <b>Page</b> |
|---------------------------------------------------------------------------------------------------------------------|-------------|
| <b>Generalities:</b>                                                                                                | <b>S2</b>   |
| <b>Experimental details, characterization of new compounds:</b>                                                     | <b>S2</b>   |
| <b>Selected NMR Spectra of 1-15:</b>                                                                                | <b>S9</b>   |
| <b>HPLC spectra of 16a-g:</b>                                                                                       | <b>S18</b>  |
| <b>X-ray crystallographic data of 12:</b>                                                                           | <b>S32</b>  |
| <b>Cartesian coordinates of the structures of enamine intermediates and transition states related to 15 and 12:</b> | <b>S33</b>  |

**Generalities:** NMR spectra were recorded on a Bruker-600 MHz spectrometer. Optical rotations were measured on a Perkin-Elmer 341 Polarimeter at  $\lambda = 589$  nm. ESIMS spectra were recorded on BioTOF Q. HPLC analyses were performed on PerkinElmer (Series 200 UV/VIS Detector and Series 200 Pump). Chiralpak AS-H and OJ-H columns were purchased from Daicel Chemical Industries, LTD. Acetone was dried over anhydrous  $K_2CO_3$  and then was distilled by adding  $P_2O_5$ . Hexane and ethyl acetate for column chromatography were distilled before use. Reactions were monitored by thin layer chromatography using silica gel HSGF254 plates. Chemical shifts were reported in ppm using the solvent residue signals as reference.

**Materials:** All starting materials were of the highest commercially available grade and used without further purification.

**Procedure for the synthesis of Boc-1:** To a solution of Boc-L-Pro (430 mg, 2.0 mmol) in DCM (20 mL) was added 4-nitrophenylhydrazine (370 mg, 2.4 mmol), HOBt (350 mg, 2.4 mmol), N, N-Diisopropylethylamine (DIEA, 700  $\mu$ L) and EDCI (460 mg, 2.4 mmol) at 0 °C. The reaction mixture was stirred at 25 °C for 12 h, and then concentrated under reduced pressure. After the resulting mixture was diluted with EtOAc (20 mL), and the organic phase was washed with saturated aqueous  $NaHCO_3$  (10 mL), aqueous HCl (1.0 M, 10 mL) and brine (10 mL), and dried over anhydrous  $Na_2SO_4$ . After removal of solvent under reduced pressure, the residue was purified through column chromatography on silica gel (eluent: hexane: ethyl acetate = 1: 1) to give **Boc-1**.

**Procedure for the synthesis of 1:** After compound **Boc-1** (1.0 g) with a mixture of TFA:  $CH_2Cl_2$  (1: 2, 20 mL) was stirred for half an hour, the solution was evaporated to dryness and then passed through a  $H^+$  ion-exchange resin column eluted with  $NH_3 \cdot H_2O$  (3.0 M). After removal of solvent under reduced pressure, the residue was purified through column chromatography on silica gel (eluent: DCM: MeOH = 20: 1) to give **1**.

**1:** Yellow solid; Yield: 60%;  $[\alpha]_D^{25} = -79.9$  ( $c = 0.244$ , MeOH); mp 153.0-154.0 $^\circ$ ;  $^1H$ NMR (600 MHz,  $CD_3OD$ )  $\delta$  (ppm) 1.80-1.91 (m, 3H), 2.20-2.23 (m, 1H), 2.93-2.97 (m, 1H), 3.06-3.10 (m, 1H), 3.76 (dd,  $J = 2.82$  Hz, 5.7 Hz, 1H), 6.80 (d,  $J = 9.12$  Hz, 2H), 8.10 (d,  $J = 9.18$  Hz, 2H);  $^{13}C$ NMR (150 MHz,  $CD_3OD$ )  $\delta$  (ppm) 25.6, 30.1, 46.6, 59.2, 110.6, 125.4, 139.5, 154.3, 175.0. ESI HRMS exact mass calcd for  $(C_{11}H_{14}N_4O_3 + H)^+$  requires  $m/z$  251.1139, found  $m/z$  251.1122.

**Procedure for the synthesis of 2 is similar to that for 1.**

**2:** yellow solid; Yield: 78%;  $[\alpha]_D^{25} = -39.5$  ( $c = 0.238$ , MeOH); mp 198-200 $^\circ$ ; The  $^1H$  and  $^{13}C$  NMR spectra showed a double set of peaks due to different conformers.  $^1H$ NMR (600 MHz,  $CD_3OD$ )  $\delta$  (ppm) 1.99-2.18 (m, 3H), 1.94 (brs, 1H), 2.43 (m, 1H), 3.34-3.38 (m, 2H), 4.40-4.63 (m, 1H), 6.83 (m, 5H);  $^{13}C$ NMR (150 MHz,  $CD_3OD$ )  $\delta$  (ppm) 23.6, 23.7, 28.9, 29.6, 45.9, 46.0, 58.5, 58.8, 112.6, 112.8, 120.1, 120.7, 128.7, 129.0, 147.5, 148.1, 168.6, 173.0. ESI HRMS exact mass calcd for  $(C_{11}H_{15}N_3O_1 + H)^+$  requires  $m/z$  206.1288, found  $m/z$  206.1279.

**Procedure for the synthesis of Boc-L-Pro-NHNH<sub>2</sub>:** Compound **Boc-4** (see procedure for the synthesis of **Boc-4**) (1.0 g), 5% Pd/C (0.1 g) and methanol (30 mL) were charged in a two-neck flask (100 mL). After stirred under hydrogen (1 atm) until **Boc-4** disappeared completely (monitored by TLC), the solution was filtered. Removal of solvent gave Boc-L-Pro-NHNH<sub>2</sub>.

**Procedure for the synthesis of Boc-3:** To a mixture of solution of Boc-L-Pro-NHNH<sub>2</sub> (460 mg, 2.0 mmol) and TEA (1.4 mL, 10 mmol) in DCM (20 mL) was added benzyl bromide (1.2 mL, 10 mmol) at room temperature. The reaction mixture was stirred at room temperature for 12 h and then concentrated under reduced pressure. After the resulting mixture was diluted with EtOAc (30 mL), and the organic phase was washed with saturated aqueous  $NaHCO_3$  (10 mL), and brine (10 mL), and dried over

anhydrous Na<sub>2</sub>SO<sub>4</sub>. After removal of solvent under reduced pressure, the residue was purified through column chromatography on silica gel (eluent: hexane: ethyl acetate = 1: 1) to give **Boc-3**.

**Procedure for the synthesis of 3:** Compounds **Boc-3** (1.0 g) was treated with a mixture of TFA: CH<sub>2</sub>Cl<sub>2</sub> (1: 2, 20 mL) for half an hour and then concentrated under reduced pressure. After saturated aqueous NaHCO<sub>3</sub> (10 mL) was added to the residue, the solution was extracted three times with EtOAc (30 mL each). The organic layers were combined, washed with brine (10 mL), and dried over anhydrous Na<sub>2</sub>SO<sub>4</sub>. After removal of solvent under reduced pressure, the residue was purified through column chromatography on silica gel (eluent: DCM: MeOH = 20: 1) to give **3**

**3:** white solid; Yield: 66%; [ $\alpha$ ]<sub>D</sub><sup>25</sup> = -19.8 (c = 0.242, MeOH); mp 204-206 °C; <sup>1</sup>H NMR (600 MHz, CD<sub>3</sub>OD)  $\delta$  (ppm) 1.12-1.23 (m, 1H), 1.58 (m, 2H), 1.90 (m, 1H), 3.13 (m, 2H), 3.87 (m, 1H), 3.95 (m, 2H), 4.07 (m, 2H), 7.24 (m, 10H); <sup>13</sup>C NMR (150 MHz, CD<sub>3</sub>OD)  $\delta$  (ppm) 23.2, 23.4, 28.6, 29.7, 45.8, 46.2, 57.7, 58.4, 60.8, 61.6, 62.3, 127.3, 127.9, 128.3, 129.1, 129.8, 136.0, 136.2, 136.8, 166.8, 171.2. ESI HRMS exact mass calcd for (C<sub>19</sub>H<sub>24</sub>N<sub>3</sub>O<sub>1</sub> + H)<sup>+</sup> requires m/z 310.1914, found m/z 310.1924.

**Procedure for the synthesis of Boc-4:** To a solution of Boc-L-Pro (430 mg, 2.0 mmol) in DCM (20 mL) was added benzyloxycarbonylhydrazine (400 mg, 2.4 mmol), HOBt (350 mg, 2.4 mmol), N,N-diisopropylethylamine (DIEA, 700  $\mu$ L) and EDCI (460 mg, 2.4 mmol) at 0 °C. The reaction mixture was stirred at 25 °C for 12 h, and then concentrated under reduced pressure. After the resulting mixture was diluted with EtOAc (20 mL), and the organic phase was washed with saturated aqueous NaHCO<sub>3</sub> (10 mL), aqueous HCl (1.0 M, 10 mL) and brine (10 mL), and dried over anhydrous Na<sub>2</sub>SO<sub>4</sub>. After removal of solvent under reduced pressure, the residue was purified through column chromatography on silica gel (eluent: hexane: ethyl acetate = 1: 1) to give **Boc-4**.

**Procedure for the synthesis of 4:** Compound **Boc-4** (1.0 g) was treated with a mixture of TFA: CH<sub>2</sub>Cl<sub>2</sub> (1: 2, 20 mL) for half an hour and then concentrated under reduced pressure. After saturated aqueous NaHCO<sub>3</sub> (10 mL) was added to the residue, the solution was extracted three times with EtOAc (30 mL each). The organic layers were combined, washed with brine (10 mL), and dried over anhydrous Na<sub>2</sub>SO<sub>4</sub>. After removal of solvent under reduced pressure, the residue was purified through column chromatography on silica gel (eluent: DCM: MeOH = 20: 1) to give **4**.

**4:** Off-white solid; Yield: 63%; [ $\alpha$ ]<sub>D</sub><sup>25</sup> = -33.3 (c = 0.766, EtOAc); <sup>1</sup>H NMR (600 MHz, CDCl<sub>3</sub>)  $\delta$  (ppm) 1.66-1.75 (brs, 1H), 1.94 (brs, 1H), 2.09 (m, 1H), 2.95 (m, 2H), 3.80 (m, 1H), 5.10-5.16 (m, 2H), 7.31-7.34 (m, 5H); <sup>13</sup>C NMR (150 MHz, CDCl<sub>3</sub>)  $\delta$  (ppm) 26.0, 30.5, 38.1, 47.2, 59.8, 67.6, 128.2, 128.3, 128.5, 135.7, 156.1, 174.6. ESI HRMS exact mass calcd for (C<sub>13</sub>H<sub>17</sub>N<sub>3</sub>O<sub>3</sub> + Na)<sup>+</sup> requires m/z 286.1162, found m/z 286.1148.

**Procedure for the synthesis of 5 is similar to that for 4.**

**5:** Off-white solid; Yield: 70%; [ $\alpha$ ]<sub>D</sub><sup>25</sup> = -46.8 (c = 0.434, MeOH); <sup>1</sup>H NMR (600 MHz, CDCl<sub>3</sub>)  $\delta$  (ppm) 1.76-1.84 (m, 2H), 1.86-1.92 (m, 1H), 1.99 (s, 1H), 2.12-2.17 (m, 1H), 2.90-2.94 (m, 1H), 3.03-3.07 (m, 1H), 3.73 (dd, J = 6.06 Hz, 8.40 Hz, 1H); <sup>13</sup>C NMR (150 MHz, CD<sub>3</sub>OD)  $\delta$  (ppm) 19.1, 25.4, 30.5, 46.5, 59.2, 170.3, 174.0. ESI HRMS exact mass calcd for (C<sub>7</sub>H<sub>13</sub>N<sub>3</sub>O<sub>2</sub> + Na)<sup>+</sup> requires m/z 194.0900, found m/z 194.0910.

**Procedure for the synthesis of 6:** To a mixture of solution of Boc-L-Pro-NHNH<sub>2</sub> (460 mg, 2.0 mmol) and TEA (1.4 mL, 10 mmol) in DCM (20 mL) was slowly added TFAA (600  $\mu$ L, 4.0 mmol) at 0 °C. The reaction mixture was stirred at 0 °C for 0.5 h, quenched with MeOH and then concentrated under reduced pressure. After the resulting mixture was diluted with EtOAc (30 mL), and the organic phase was washed with saturated aqueous NaHCO<sub>3</sub> (10 mL), aqueous HCl (1.0 M, 10 mL) and brine (10 mL),

and dried over anhydrous Na<sub>2</sub>SO<sub>4</sub>. After removal of solvent under reduced pressure, the residue was purified through column chromatography on silica gel (eluent: hexane: ethyl acetate = 1: 1) to give **Boc-6**.

Compound **Boc-6** (1.0 g) reacted with a mixture of TFA: CH<sub>2</sub>Cl<sub>2</sub> (1: 2, 20 mL) for half an hour and then concentrated under reduced pressure. The residue was purified through column chromatography on silica gel (eluent: DCM: MeOH) = 10:1 to give **6**.

**6**: white solid; Yield: 66%; [ $\alpha$ ]<sub>D</sub><sup>25</sup> = -8.6 (c = 0.51, MeOH); mp 208-210 °C; <sup>1</sup>HNMR (600 MHz, CD<sub>3</sub>OD)  $\delta$  (ppm) 2.08-2.18 (m, 3H), 2.46-2.52 (m, 1H), 3.34-3.38 (m, 1H), 3.40-3.45 (m, 1H), 4.38 (dd, *J* = 6.6 Hz, 8.28 Hz, 1H), 3.03-3.07 (m, 1H), 3.73-3.96 (m, 1H); <sup>13</sup>CNMR (150 MHz, CD<sub>3</sub>OD)  $\delta$  (ppm) 23.5, 29.4, 46.0, 58.6, 114.9, 116.8, 156.4, 156.7, 167.6. ESI HRMS exact mass calcd for (C<sub>7</sub>H<sub>10</sub>F<sub>3</sub>N<sub>3</sub>O<sub>3</sub> + H)<sup>+</sup> requires m/z 226.0798, found m/z 226.0789.

**Procedure for the synthesis of Z-L-Pro-NHNH<sub>2</sub>**: To a solution of Z-L-Pro (500 mg, 2 mmol) in DMF (20 mL) was added NH<sub>2</sub>NH<sub>2</sub>·2HCl (250mg, 2.4 mmol), HOBt (350 mg, 2.4mol), DIEA (1.4 mL) and EDCI (460 mg, 2.4 mmol) at 0 °C. The reaction mixture was stirred at 25 °C for 24h, and then concentrated under reduced pressure. After the resulting mixture was diluted with EtOAc (20 mL), and the organic phase was washed with saturated aqueous NaHCO<sub>3</sub> (10 mL), aqueous HCl (1.0 M, 10 mL) and brine (10 mL), and dried over anhydrous Na<sub>2</sub>SO<sub>4</sub>. After removal of solvent under reduced pressure, the residue was purified through column chromatography on silica gel (eluent: DCM: ethyl acetate = 4: 1) to give **Z-L- Pro-NHNH<sub>2</sub>**.

**Procedure for the synthesis of Z-7**: To a solution of 1-Z-4-Boc-L-Piperazine-2-carboxylic acid (730 mg, 2 mmol) in DCM (20 mL) was added Z-L-Pro-NHNH<sub>2</sub> (631 mg, 2.4 mmol), HOBt (350 mg, 2.4mol), DIEA (1.4 mL) and EDCI (460 mg, 2.4 mmol) at 0 °C. The reaction mixture was stirred at 25 °C for 24h, and then concentrated under reduced pressure. After the resulting mixture was diluted with EtOAc (20 mL), and the organic phase was washed with saturated aqueous NaHCO<sub>3</sub> (10 mL), aqueous HCl (1.0 M, 10 mL) and brine (10 mL), and dried over anhydrous Na<sub>2</sub>SO<sub>4</sub>. After removal of solvent under reduced pressure, the residue was purified through column chromatography on silica gel (eluent: Hexane: ethyl acetate = 1: 1) to give **Z-7**.

**Procedure for the synthesis of 7**: Compound **Z-7** (1.0 g), 5% Pd/C (0.1 g) and methanol (30 mL) were charged in a two-neck flask (100 mL). After stirred under hydrogen (1 atm) until **Z-7** disappeared completely (monitored by TLC), the solution was filtered. After removal of solvent under reduced pressure, the residue was purified through column chromatography on silica gel (eluent: DCM: MeOH = 10:1) to give **7**.

**7**: off-white solid; Yield: 50%; [ $\alpha$ ]<sub>D</sub><sup>25</sup> = +46.6 (c = 0.336, MeOH); mp 64.7-67.7 °C; <sup>1</sup>HNMR (600 MHz, CD<sub>3</sub>OD)  $\delta$  (ppm) 1.46 (s, 9H), 1.77-1.85 (m, 2H), 1.89-1.94 (m, 1H), 2.13-2.19 (m, 1H), 2.67-2.71 (m, 1H), 2.93-3.10 (m, 5H), 3.37 (dd, *J* = 3.36 Hz, 9.54 Hz, 1H), 3.75-3.78 (m, 2H), 4.06 (brs, 1H); <sup>13</sup>C NMR (150 MHz, CD<sub>3</sub>OD)  $\delta$  (ppm) 25.2, 27.2, 30.4, 43.5, 46.4, 56.9, 59.3, 80.1, 94.3, 154.9, 169.9, 172.9. ESI HRMS exact mass calcd for (C<sub>15</sub>H<sub>27</sub>N<sub>5</sub>O<sub>4</sub> + Na)<sup>+</sup> requires m/z 364.1955, found m/z 364.1939.

**Procedure for the synthesis of Z-8**: To a solution of pyridine-2-carboxylic acid (295 mg, 2.4 mmol) in DCM (20 mL) was added Z-L-Pro-NHNH<sub>2</sub> (530 mg, 2 mmol), HOBt (350 mg, 2.4mol), N,N-Diisopropylethylamine (DIEA, 700 $\mu$ L) and EDCI (460 mg, 2.4 mmol) at 0 °C. The reaction mixture was stirred at 25°C for 12 h, and then concentrated under reduced pressure. After the resulting mixture was diluted with EtOAc (20 mL), and the organic phase was washed with saturated aqueous NaHCO<sub>3</sub> (10 mL), aqueous HCl (1.0 M, 10 mL) and brine (10 mL), and dried over anhydrous Na<sub>2</sub>SO<sub>4</sub>. After removal

of solvent under reduced pressure, the residue was purified through column chromatography on silica gel (eluent: hexane: ethyl acetate = 1: 1) to give **Z-8**

**Procedure for the synthesis of 8:** Compound **Z-8** (1.0 g), 5% Pd/C (0.1 g) and methanol (30 mL) were charged in a two-neck flask (100 mL). After stirred under hydrogen (1 atm) until **Z-8** disappeared completely (monitored by TLC), the solution was filtered. After removal of solvent under reduced pressure, the residue was purified through column chromatography on silica gel (eluent: DCM: MeOH = 10: 1) to give **8**.

**8:** Yellow solid; Yield: 55%;  $[\alpha]_D^{25} = -20$  ( $c = 0.12$ , MeOH); The  $^1\text{H}$  and  $^{13}\text{C}$ NMR spectra show a double set of peaks in a ratio of about 2: 1 due to different conformers.  $^1\text{H}$ NMR (600 MHz,  $\text{CD}_3\text{OD}$ )  $\delta$  (ppm) 1.81-1.96 (m, 2H), 2.02-2.07 (m, 1H), 2.21-2.27 (m, 1H), 2.90 (m, 1H), 3.02 (m, 1H), 3.96 and 4.07 (dd,  $J = 6.06\text{ Hz}$ , 8.46 Hz, and q,  $J = 4.62\text{ Hz}$ , 1H), 7.55-7.62 (m, 1H), 7.95-8.00 (m, 1H), 8.09-8.11 (m, 1H), 8.63-8.68 (m, 1H);  $^{13}\text{C}$ NMR (150 MHz,  $\text{CD}_3\text{OD}$ )  $\delta$  (ppm) 24.5, 24.8, 29.3, 30.1, 46.3, 59.7, 61.4, 121.9, 122.4, 126.6, 127.0, 137.4, 148.6, 149.1, 162.5, 164.7, 170.4, 173.8. ESI HRMS exact mass calcd for  $(\text{C}_{11}\text{H}_{14}\text{N}_4\text{O}_2 + \text{H})^+$  requires  $m/z$  235.1190, found  $m/z$  235.1203.

**Procedure for the synthesis of Boc-9:** To a solution of Z-L-Phenylalanine (400 mg, 2.4 mmol) in DCM (20 mL) was added L-Boc-Pro-NHNH<sub>2</sub> (460 mg, 2 mmol), HOBt (350 mg, 2.4 mmol), DIEA (700  $\mu\text{L}$ ) and EDCI (460 mg, 2.4 mmol) at 0 °C. The reaction mixture was stirred at 25 °C for 24h, and then concentrated under reduced pressure. After the resulting mixture was diluted with EtOAc (20 mL), and the organic phase was washed with saturated aqueous NaHCO<sub>3</sub> (10 mL), aqueous HCl (1.0 M, 10 mL) and brine (10 mL), and dried over anhydrous Na<sub>2</sub>SO<sub>4</sub>. After removal of solvent under reduced pressure, the residue was purified through column chromatography on silica gel (eluent: hexane: ethyl acetate = 1: 1) to give **Boc-9**.

**Procedure for the synthesis of 9 is similar to that for 1.**

**9:** white solid; Yield: 61%;  $[\alpha]_D^{25} = -48.9$ . ( $c = 0.552$ , MeOH); mp 153.7-154.7 $^\circ$ ;  $^1\text{H}$ NMR (600 MHz,  $\text{CD}_3\text{OD}$  and  $\text{CDCl}_3$ )  $\delta$  (ppm) 1.79-1.87 (m, 2H), 1.91-1.97 (m, 1H), 2.15-2.20 (m, 1H), 2.88 (dd,  $J = 9.9\text{ Hz}$ , 13.86 Hz, 1H), 2.94-2.98 (m, 1H), 3.08-3.12 (m, 1H), 3.22 (dd,  $J = 4.74\text{ Hz}$ , 13.92 Hz, 1H), 3.79 (dd,  $J = 6.12\text{ Hz}$ , 8.70 Hz, 1H), 4.48 (dd,  $J = 4.74\text{ Hz}$ , 9.72 Hz, 1H), 4.99-5.05 (m, 2H), 7.19-7.33 (m, 10H);  $^{13}\text{C}$ NMR (150 MHz,  $\text{CD}_3\text{OD}$  and  $\text{CDCl}_3$ )  $\delta$  (ppm) 25.2, 30.4, 37.8, 46.5, 55.1, 59.3, 66.2, 126.3, 127.3, 127.5, 128.0, 128.3, 129.2, 136.7, 137.1, 156.8, 170.9, 172.7. ESI HRMS exact mass calcd for  $(\text{C}_{22}\text{H}_{26}\text{N}_4\text{O}_4 + \text{H})^+$  requires  $m/z$  411.2027, found  $m/z$  411.2006.

**Procedure for the synthesis of Boc-10:** Compound **Boc-9** (1.0 g), 5% Pd/C (0.1 g) and methanol (30 mL) were charged in a two-neck flask (100 mL). After stirred under hydrogen (1 atm) until **Boc-9** disappeared completely (monitored by TLC), the solution was filtered. After removal of solvent under reduced pressure, the residue was diluted with DCM. The solution was added TEA (1.4 mL, 10 mmol) and TFAA (600  $\mu\text{L}$ , 4.0 mmol) at 0 °C. The reaction mixture was stirred at 0 °C for 0.5h, quenched with MeOH, and then concentrated under reduced pressure. After the resulting mixture was diluted with EtOAc (30 mL), and the organic phase was washed with saturated aqueous NaHCO<sub>3</sub> (10 mL), aqueous HCl (1.0 M, 10 mL) and brine (10 mL), and dried over anhydrous Na<sub>2</sub>SO<sub>4</sub>. After removal of solvent under reduced pressure, the residue was purified through column chromatography on silica gel (eluent: hexane: ethyl acetate = 1: 1) to give **Boc-10**.

**Procedure for the synthesis of 10:** Compound **Boc-10** (1.0 g) reacted with a mixture of TFA:  $\text{CH}_2\text{Cl}_2$  (1: 2, 20 mL) for an hour and then concentrated under reduced pressure. The residue was purified through column chromatography on silica gel (eluent: DCM: MeOH = 10: 1) to give **10**.

**10:** white solid; Yield: 63%;  $[\alpha]_D^{25} = -22.6$  ( $c = 0.212$ , MeOH); mp 194-196 $^\circ$ ;  $^1\text{H}$ NMR (600 MHz,

CD<sub>3</sub>OD)  $\delta$  (ppm) 1.97-2.04 (m, 2H), 2.05-2.19 (m, 1H), 2.32-2.38 (m, 1H), 2.99 (dd,  $J = 10.02$  Hz, 14.10 Hz, 1H), 3.18-3.22 (m, 1H), 3.27-3.30 (m, 1H), 4.13-4.14 (brs, 1H), 4.76 (dd,  $J = 5.16$  Hz, 9.78 Hz, 1H), 7.21-7.25 (m 1H), 7.26-7.32 (m, 4H); <sup>13</sup>CNMR (150 MHz, CD<sub>3</sub>OD)  $\delta$  (ppm) 24.2, 29.8, 37.0, 46.2, 53.4 and 53.5, 58.9, 114.9, 116.8, 126.6, 128.1, 128.9, 136.3, 157.2, 157.4, 169.6, 169.8; ESI HRMS exact mass calcd for (C<sub>16</sub>H<sub>19</sub>F<sub>3</sub>N<sub>4</sub>O<sub>3</sub>- H)<sup>-</sup> requires m/z 371.13256, found m/z 371.1312.

**Procedure for the synthesis of Boc-11:** Compound **Boc-9** (1.0 g), 5% Pd/C (0.1 g) and methanol (30 mL) were charged in a two-neck flask (100 mL). After stirred under hydrogen (1 atm) until **Boc-9** disappeared completely (monitored by TLC), the solution was filtered. After removal of solvent under reduced pressure, the residue was diluted with DMF (30 mL). The solution was added TEA (835  $\mu$ L, 6 mmol) and Br(CH<sub>2</sub>)<sub>4</sub>Br (360  $\mu$ L, 3.0 mmol) at room temperature. After the reaction mixture was stirred at 60 °C for 5 h, then cooled to room temperature. The reaction mixture was added saturated aqueous NaHCO<sub>3</sub> (40 mL) and was extracted four times with EtOAc (40 mL each). The organic layers were combined, washed with brine (40 mL), and dried over anhydrous Na<sub>2</sub>SO<sub>4</sub>. After removal of solvent under reduced pressure, the residue was purified through column chromatography on silica gel (eluent: hexane: ethyl acetate = 1: 2) to give **Boc-11**.

**Procedure for the synthesis of 11:** Compound **Boc-11** (1.0 g) reacted with a mixture of TFA: CH<sub>2</sub>Cl<sub>2</sub> (1: 2, 20 mL) for an hour and then concentrated under reduced pressure. After chromatography on a H<sup>+</sup> ion-exchange resin column eluted with NH<sub>3</sub> H<sub>2</sub>O (3.0 M) and removal of solvent under reduced pressure, the residue was purified through column chromatography on silica gel (eluent: DCM: MeOH = 10: 1) to give **11**.

**11:** off-white solid; Yield: 45%; [ $\alpha$ ]<sub>D</sub><sup>25</sup> = + 13.0 (c = 0.10, MeOH); <sup>1</sup>HNMR (600 MHz, CD<sub>3</sub>OD)  $\delta$  (ppm) 1.61-1.74 (m, 1H), 1.81-1.90 (m, 6H), 2.06-2.18 (m, 1H), 2.65-2.71 (m, 1H), 2.79 (brs, 3H), 2.95-2.99 (m, 1H), 3.03-3.13 (m, 3H), 3.25-2.27 (t,  $J = 7.68$  Hz, 1H), 3.71-3.78 (m, 1H), 7.16-7.19 (m, 1H), 7.22-7.34 (m, 4H); <sup>13</sup>CNMR (150 MHz, CD<sub>3</sub>OD)  $\delta$  (ppm) 22.8, 25.0, 30.2, 37.3, 46.4, 50.7, 59.0, 68.1, 126.1, 128.0, 129.0, 137.7, 170.6, 172.0. ESI HRMS exact mass calcd for (C<sub>18</sub>H<sub>26</sub>N<sub>4</sub>O<sub>2</sub> + H)<sup>+</sup> requires m/z 331.2129, found m/z 331.2117.

**Procedure for the synthesis of Boc-12:** To a solution of Boc-L-Pro (520 mg, 2.4 mmol) in DMF (20 mL) was added hydrazine dihydrochloride (NH<sub>2</sub>NH<sub>2</sub>·2HCl, 106 mg, 1mmol), HOBt (350 mg, 2.4mol), DIEA (1.4 mL) and EDCI (460 mg, 2.4 mmol) at 0 °C. The reaction mixture was stirred at 25 °C for 24h, and then concentrated under reduced pressure. After the resulting mixture was diluted with EtOAc (20 mL), and the organic phase was washed with saturated aqueous NaHCO<sub>3</sub> (10 mL), aqueous HCl (1.0 M, 10 mL) and brine (10 mL), and dried over anhydrous Na<sub>2</sub>SO<sub>4</sub>. After removal of solvent under reduced pressure, the residue was purified through column chromatography on silica gel (eluent: hexane: ethyl acetate = 1: 1) to give **Boc-12**.

**Procedure for the synthesis of 12:** Compound **Boc-12** (1.0 g) reacted with a mixture of TFA: CH<sub>2</sub>Cl<sub>2</sub> (1: 2, 20 mL) for an hour and then concentrated under reduced pressure. After chromatography on a H<sup>+</sup> ion-exchange resin column eluted with NH<sub>3</sub> H<sub>2</sub>O (3.0 M) and removal of solvent under reduced pressure, the residue was purified through column chromatography on silica gel (eluent: DCM: MeOH (NH<sub>3</sub>) = 10: 1) to give **12**.

**12:** white solid; Yield: 71%; [ $\alpha$ ]<sub>D</sub><sup>25</sup> = -56.0. (c = 0.48, MeOH); mp 155.3-158.3 °C; <sup>1</sup>HNMR (600 MHz, CD<sub>3</sub>OD)  $\delta$  (ppm) 1.75-1.85 (m, 2H), 1.88-1.93 (m, 1H), 2.13-2.19 (m, 1H), 2.93-2.97 (m, 1H), 3.04-3.08 (m, 1H), 3.75 (dd,  $J = 5.94$  Hz, 8.64 Hz, 1H); <sup>13</sup>CNMR (150 MHz, CD<sub>3</sub>OD)  $\delta$  (ppm) 25.3, 30.4, 46.5, 59.3, 172.5. ESI HRMS exact mass calcd for (C<sub>10</sub>H<sub>18</sub>N<sub>4</sub>O<sub>2</sub> + Na)<sup>+</sup> requires m/z 249.1322, found m/z 249.1310.

**Procedure for the synthesis of Boc-13:** To a solution of **12** (652 mg, 2 mmol) in DMF (20 mL) was added benzaldehyde (245  $\mu$ L, 2.4 mmol) at room temperature. The reaction mixture was stirred for 0.5h at room temperature, and then NaBH<sub>3</sub>CN (265 mg, 4 mmol) was added in portions and the reactions mixture was stirred for another 1 h. The reaction mixture was quenched with H<sub>2</sub>O and then concentrated under reduced pressure. After the residue was diluted with EtOAc (30 mL), and the organic phase was washed with aqueous NaOH (1.0 M, 10 mL) and brine (10 mL), and dried over anhydrous Na<sub>2</sub>SO<sub>4</sub>. After removal of solvent under reduced pressure, the residue was purified through column chromatography on silica gel (eluent: Hexane: ethyl acetate = 1: 1) to give **Boc-13**.

**Procedure for the synthesis of 13:** Compound **Boc-13** (1.0 g) was treated with a mixture of TFA: CH<sub>2</sub>Cl<sub>2</sub> (1: 2, 20 mL) for an hour and then concentrated under reduced pressure. After chromatography on a H<sup>+</sup> ion-exchange resin column eluted with NH<sub>3</sub>:H<sub>2</sub>O (3.0 M) and removal of solvent under reduced pressure, the residue was purified through column chromatography on silica gel (eluent: DCM: MeOH = 10:1) to give **13**.

**13:** white solid; Yield: 50%;  $[\alpha]_D^{25} = -20.8$  (c = 0.048, MeOH); <sup>1</sup>HNMR (600 MHz, CD<sub>3</sub>OD)  $\delta$  (ppm) 1.78-1.86 (m, 1H), 1.87-1.97 (m, 4H), 2.00-2.04 (m, 1H), 2.18-2.27 (m, 1H), 2.34-2.38 (m, 1H), 2.98-3.01 (m, 1H), 3.07-3.11 (m, 2H), 3.19-3.25 (m, 2H), 3.49 (d, J = 12.8 Hz, 1H), 3.95-3.99 (m, 2H), 7.28 (t, J = 7.26 Hz, 7.44 Hz, 1H), 7.29 (t, J = 7.26 Hz, 2H), 7.37 (d, J = 7.08 Hz, 2H), <sup>13</sup>CNMR (150 MHz, CD<sub>3</sub>OD)  $\delta$  (ppm) 23.2, 24.7, 30.0, 46.3, 53.0, 58.9, 59.3, 66.1, 126.9, 127.9, 128.9, 138.2, 170.2, 173.5. ESI HRMS exact mass calcd for (C<sub>17</sub>H<sub>24</sub>N<sub>4</sub>O<sub>2</sub> + H)<sup>+</sup> requires m/z 317.1972, found m/z 317.1982.

**Procedure for the synthesis of Z-14:** To a solution of Z-L-Pro (600 mg, 2.4 mmol) in DCM (20 mL) was added L-Boc-Pro-NHNH<sub>2</sub> (460 mg, 2 mmol), HOBT (350 mg, 2.4 mmol), DIEA (700  $\mu$ L) and EDCI (460 mg, 2.4 mmol) at 0 °C. The reaction mixture was stirred at 25 °C for 12 h, and then concentrated under reduced pressure. After the resulting mixture was diluted with EtOAc (20 mL), and the organic phase was washed with saturated aqueous NaHCO<sub>3</sub> (10 mL), aqueous HCl (1.0 M, 10 mL) and brine (10 mL), and dried over anhydrous Na<sub>2</sub>SO<sub>4</sub>. After removal of solvent under reduced pressure, the residue was purified through column chromatography on silica gel (eluent: hexane: ethyl acetate = 1: 1) to give **Z-14**.

**Procedure for the synthesis of 14:** Compound **Z-14** (1.0 g), 5% Pd/C (0.1 g) and methanol (30 mL) were charged in a two-neck flask (100 mL). After stirred under hydrogen (1 atm) until **Z-14** disappeared completely (monitored by TLC), the solution was filtered. After removal of solvent under reduced pressure, the residue was purified through column chromatography on silica gel (eluent: DCM: MeOH = 10: 1) to give **14**.

**14:** white solid; Yield: 66%;  $[\alpha]_D^{25} = -73.0$ . (c = 0.104, MeOH); mp 153.7-156.0 $\square$ ; <sup>1</sup>HNMR (600 MHz, CD<sub>3</sub>OD)  $\delta$  (ppm) 1.47 (d, J = 11.34 Hz, 9H), 1.82-1.88 (m, 2H), 1.89-1.97 (m, 2H), 2.00-2.10 (m, 2H), 2.19-2.30 (m, 1H), 2.97-3.00 (m, 1H), 3.41-3.45 (m, 1H), 3.52-3.54 (brs, 1H), 3.80 (dd, J = 6.06 Hz, 8.46 Hz, 1H), 4.24-4.26 (m, 1H); <sup>13</sup>CNMR (150 MHz, CD<sub>3</sub>OD)  $\delta$  (ppm) 23.2, 23.9, 25.2, 27.2, 30.0, 30.4, 31.1, 46.4, 46.8, 48.2, 59.1, 80.1, 154.7, 172.4, 172.7. ESI HRMS exact mass calcd for (C<sub>15</sub>H<sub>26</sub>N<sub>4</sub>O<sub>4</sub> - H)<sup>-</sup> requires m/z 325.1870, found m/z 325.1887.

**Procedure for the synthesis of Boc-15:** To a solution of **Boc-12** (831 mg, 2 mmol) in THF (20 mL) was added benzyl bromide (260  $\mu$ L, 2.2 mmol) and sodium hydride (250 mg, 4 mmol) at 0°C. The reaction mixture was stirred at 25 °C for 24 h, and then quenched with H<sub>2</sub>O. The mixture was added EtOAc (30 mL), and the organic phase was washed with brine (10 mL), and dried over anhydrous Na<sub>2</sub>SO<sub>4</sub>. After removal of solvent under reduced pressure, the residue was purified through column chromatography on silica gel (eluent: hexane: ethyl acetate = 3: 1) to give **Boc-15**.

**Procedure for the synthesis of 15:** Compound **Boc-15** (1.0 g) was treated with a mixture of TFA: CH<sub>2</sub>Cl<sub>2</sub> (1:2, 20 mL) for an hour and then concentrated under reduced pressure. After chromatography on a H<sup>+</sup> ion-exchange resin column eluted with NH<sub>3</sub>/H<sub>2</sub>O (3.0 M) and removal of solvent under reduced pressure, the residue was purified through column chromatography on silica gel (eluent: DCM: MeOH = 10: 1) to give **15**.

**15:** white solid; Yield: 62%; [ $\alpha$ ]<sub>D</sub><sup>25</sup> = -56.0 (c = 0.116, MeOH); mp 101.3-103.7 °C; <sup>1</sup>HNMR (600 MHz, CD<sub>3</sub>OD)  $\delta$  (ppm) 1.59-1.64 (m, 1H), 1.67-1.82 (m, 5H), 1.99-2.07 (m, 2H), 2.76-2.80 (m, 1H), 2.81-2.85 (m, 1H), 2.94-2.98 (m, 1H), 3.11-3.15 (m, 1H), 3.55 (dd, *J* = 6.18 Hz, 8.46 Hz, 1H), 3.78 (dd, *J* = 6.36 Hz, 8.82 Hz, 1H), 4.65-4.93 (brs, 2H), 7.27-7.36 (m, 5H); <sup>13</sup>CNMR (150 MHz, CD<sub>3</sub>OD)  $\delta$  (ppm) 25.5, 25.6, 30.1, 30.5, 46.6, 50.5, 57.5, 58.9, 127.6, 128.3, 128.7, 135.5, 174.2, 175.7. ESI HRMS exact mass calcd for (C<sub>17</sub>H<sub>24</sub>N<sub>4</sub>O<sub>2</sub> + Na)<sup>+</sup> requires *m/z* 339.1791, found *m/z* 339.1779.

**General procedure for aldol reaction in toluene using catalyst 15:** To a solution of **15** (0.04 mmol, 20 mol%) in a mixture of acetone (0.4 mL) and toluene (1.6 mL) was added TFA (0.04 mmol). The reaction mixture was stirred at 0 °C for 10 minutes, and then aldehyde (0.2 mmol) was added. The reaction mixture was stirred at 0 °C for another 4-72 h and then was quenched with saturated ammonium chloride solution (1 mL) and the layers were separated. The aqueous layer was extracted three times (15 mL each) with ethyl acetate. The combined organic layers was washed with brine (5 mL) and dried over anhydrous MgSO<sub>4</sub>. After removal of solvent, the residue was purified through flash column chromatography on silica gel (eluent: Hexane: AcOEt = 3:1) to give the pure aldol adducts.



### Selected NMR Spectra

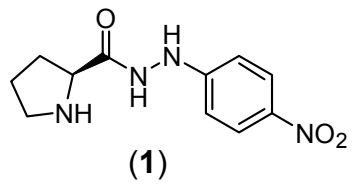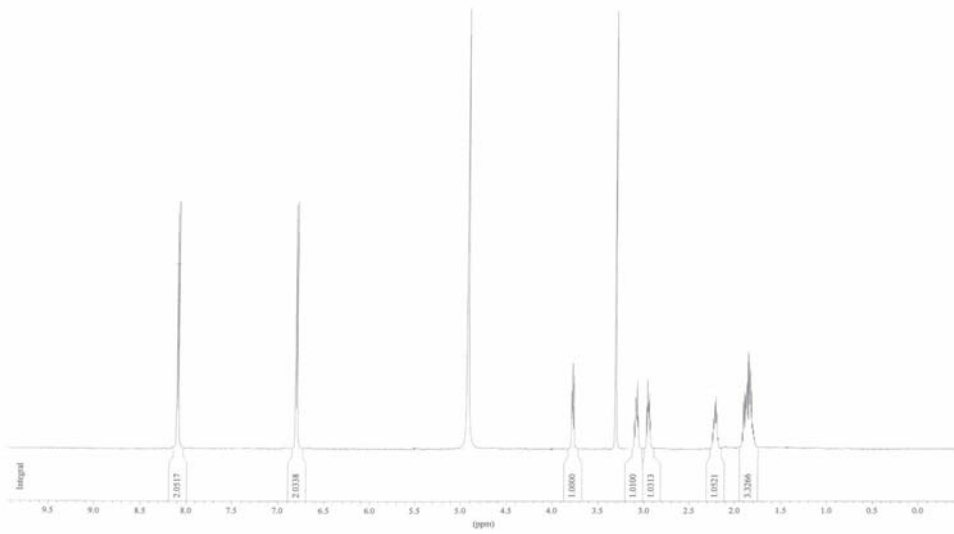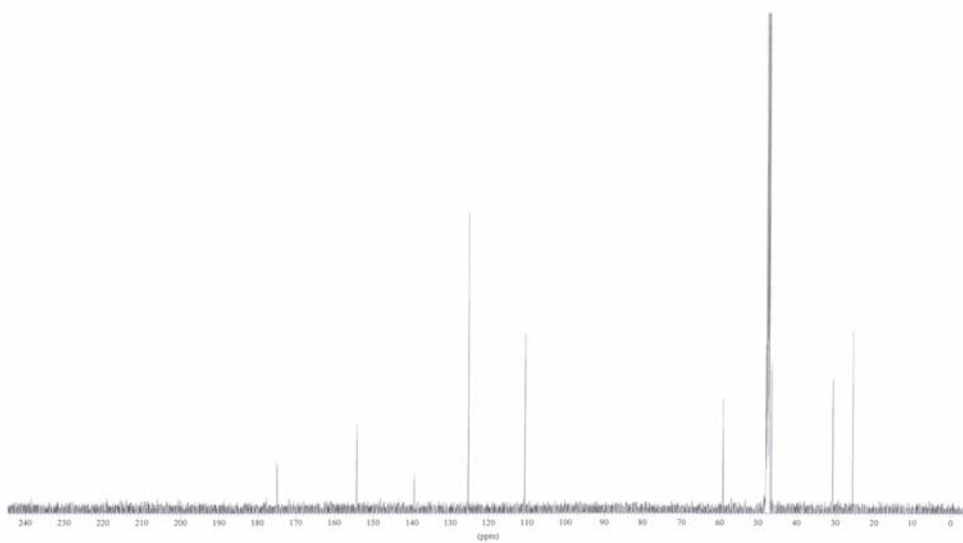

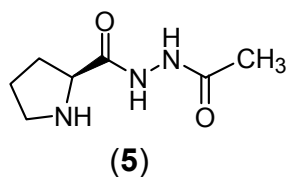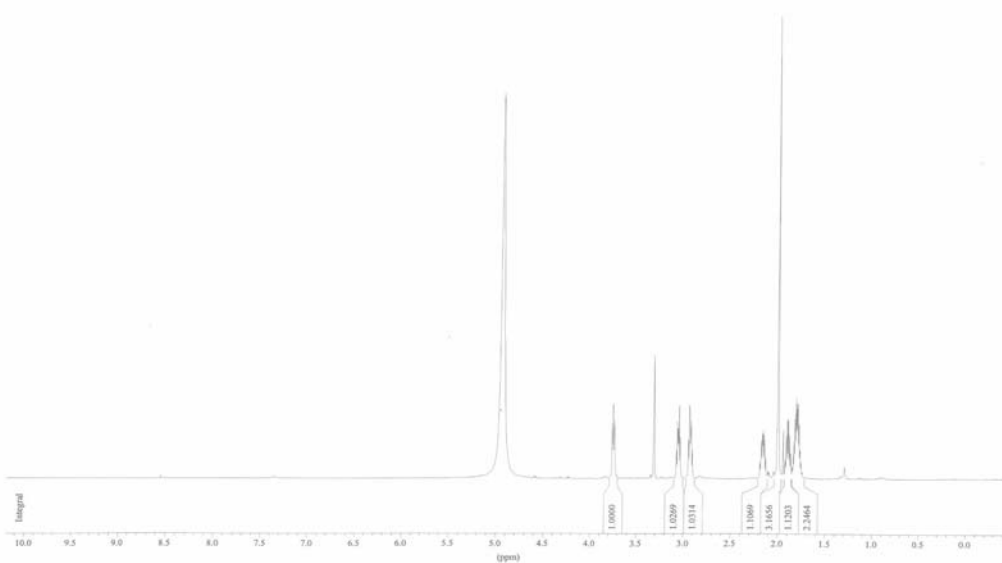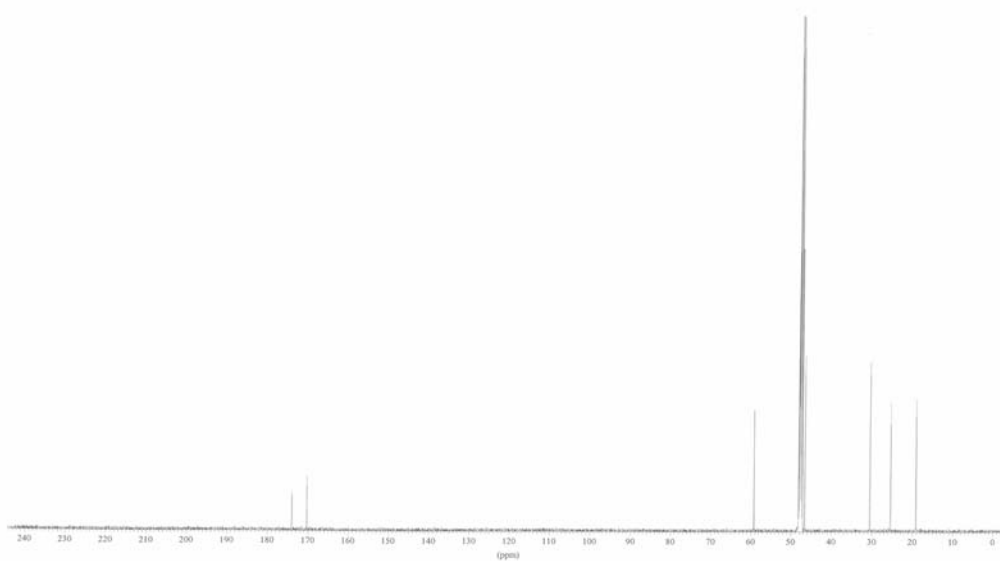

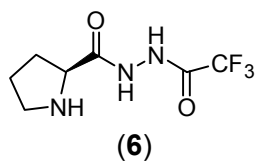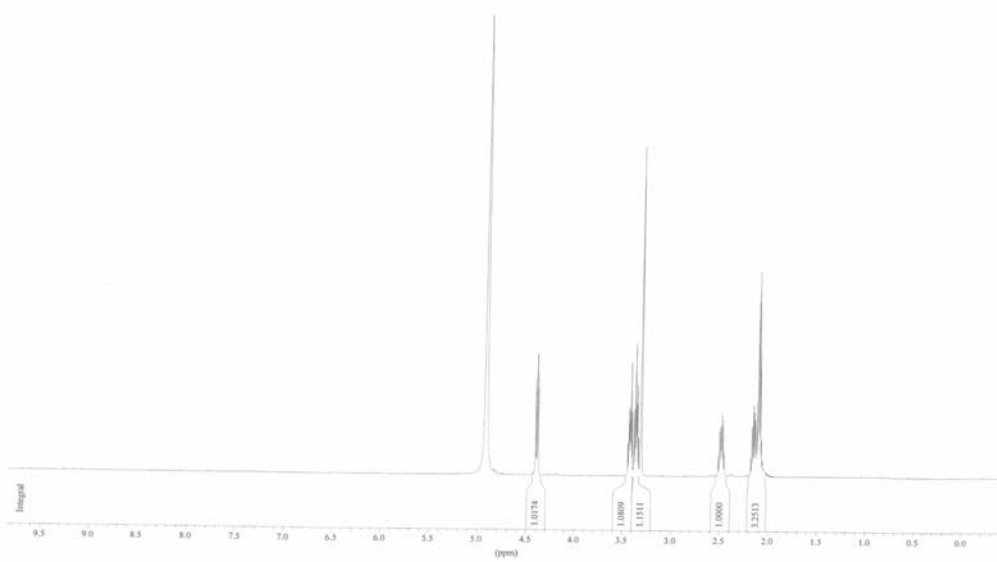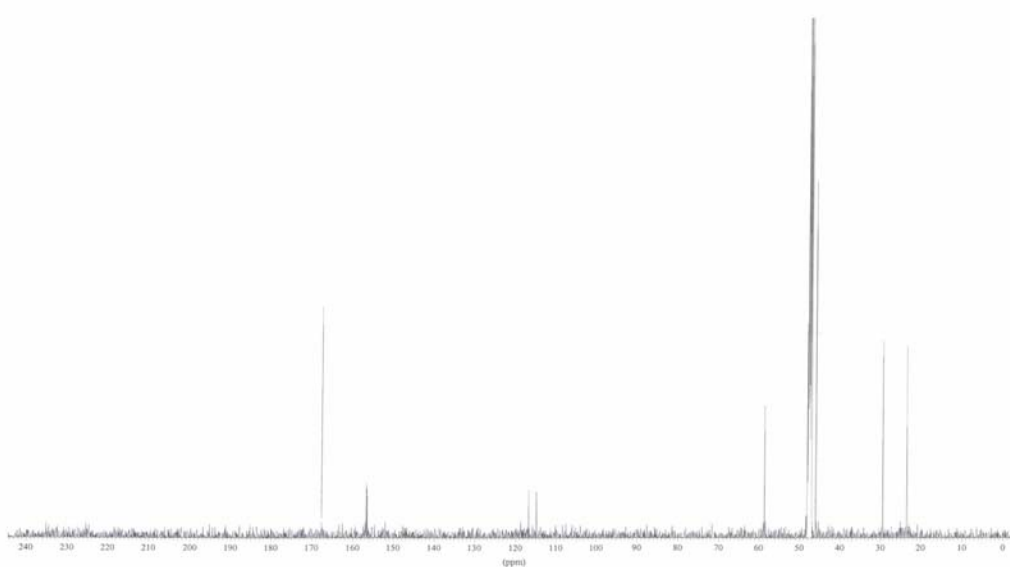

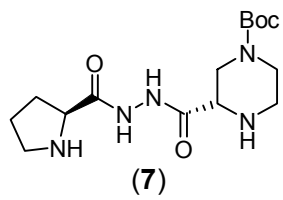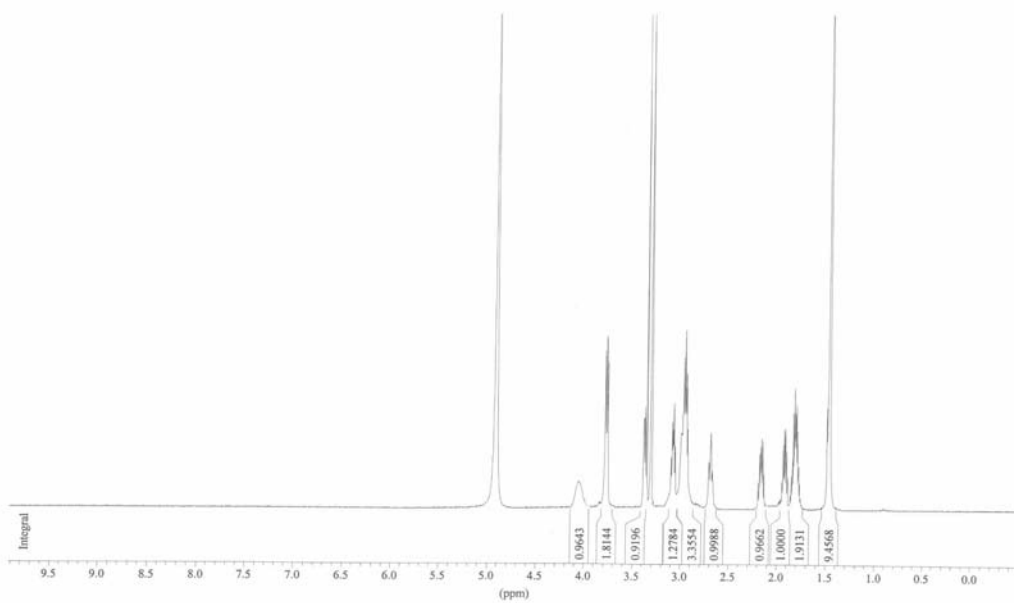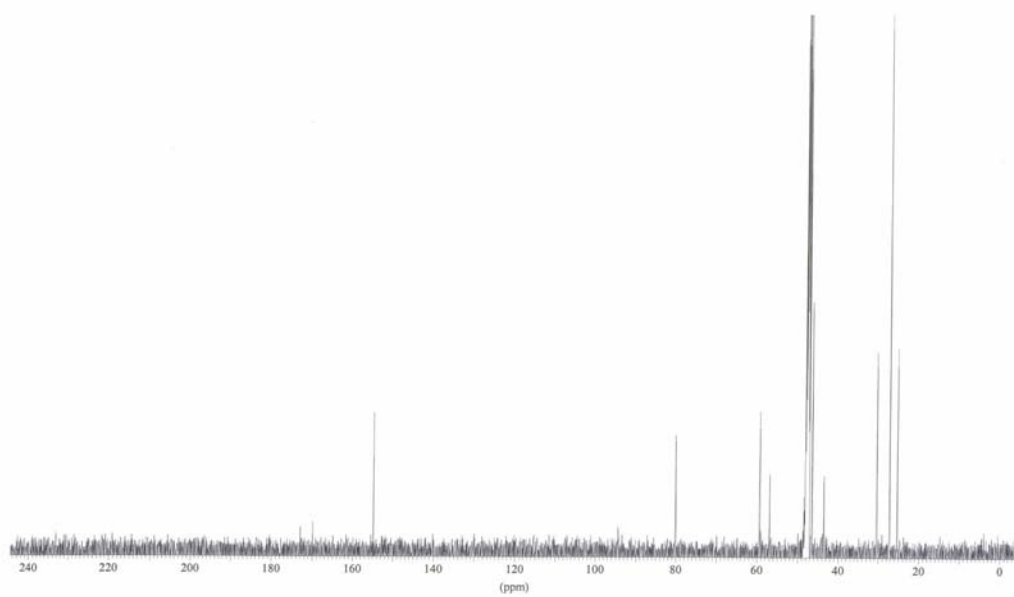

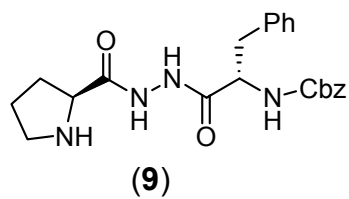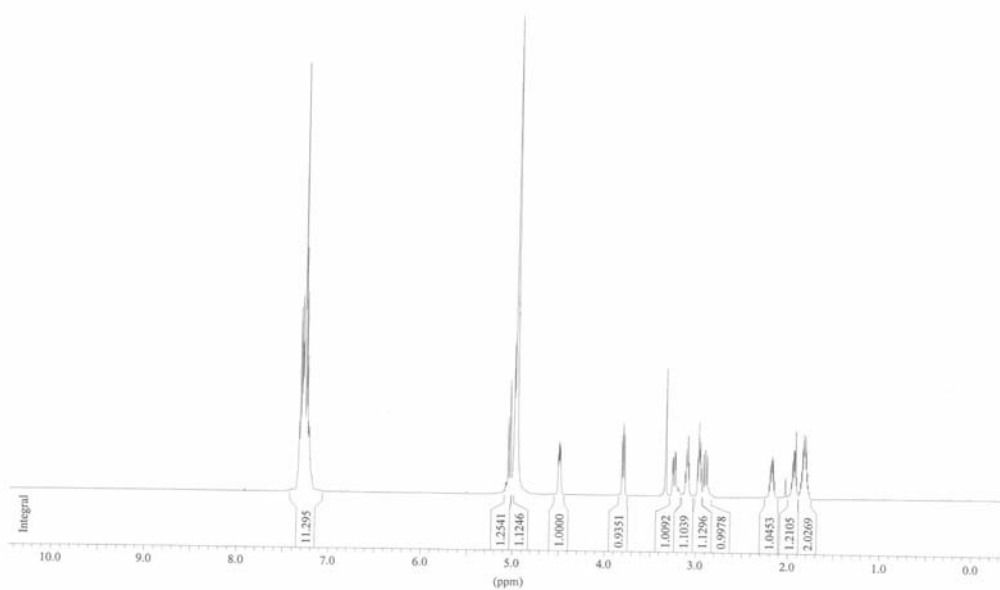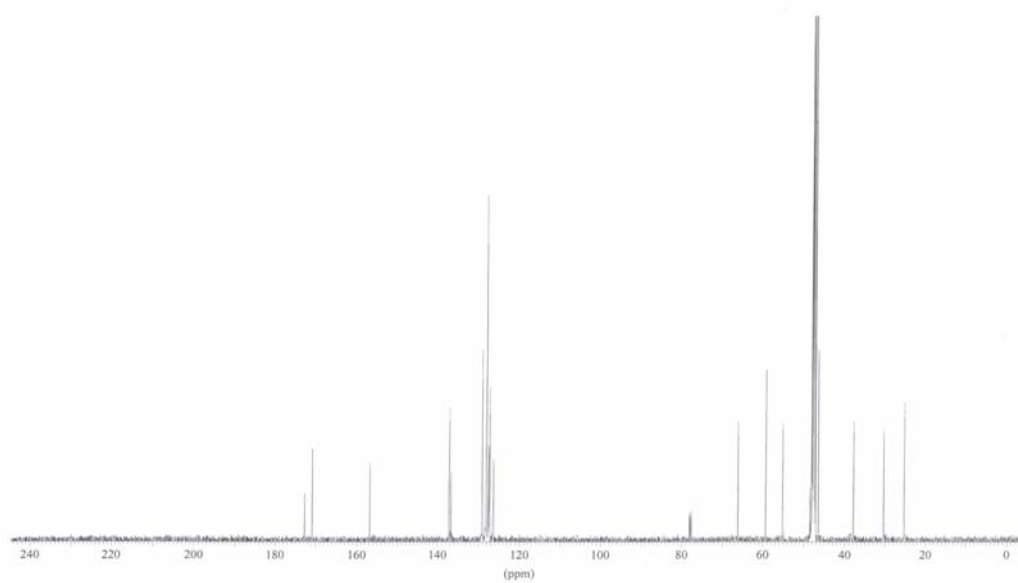

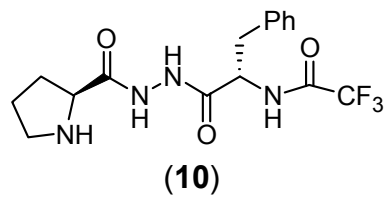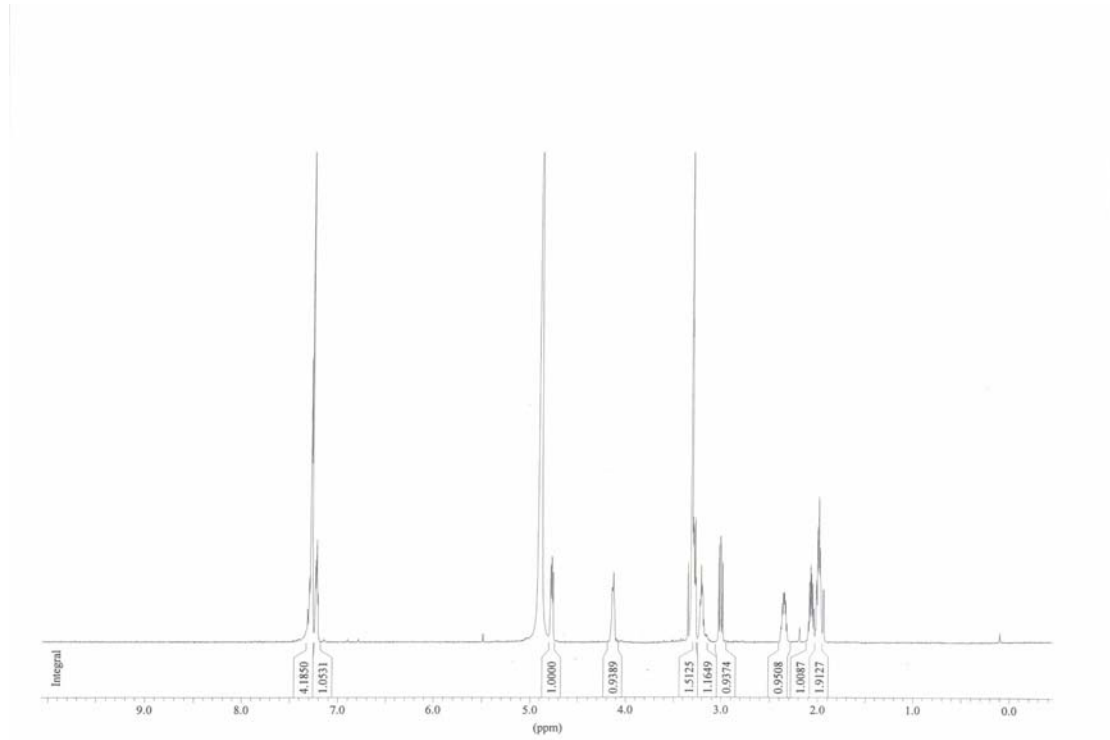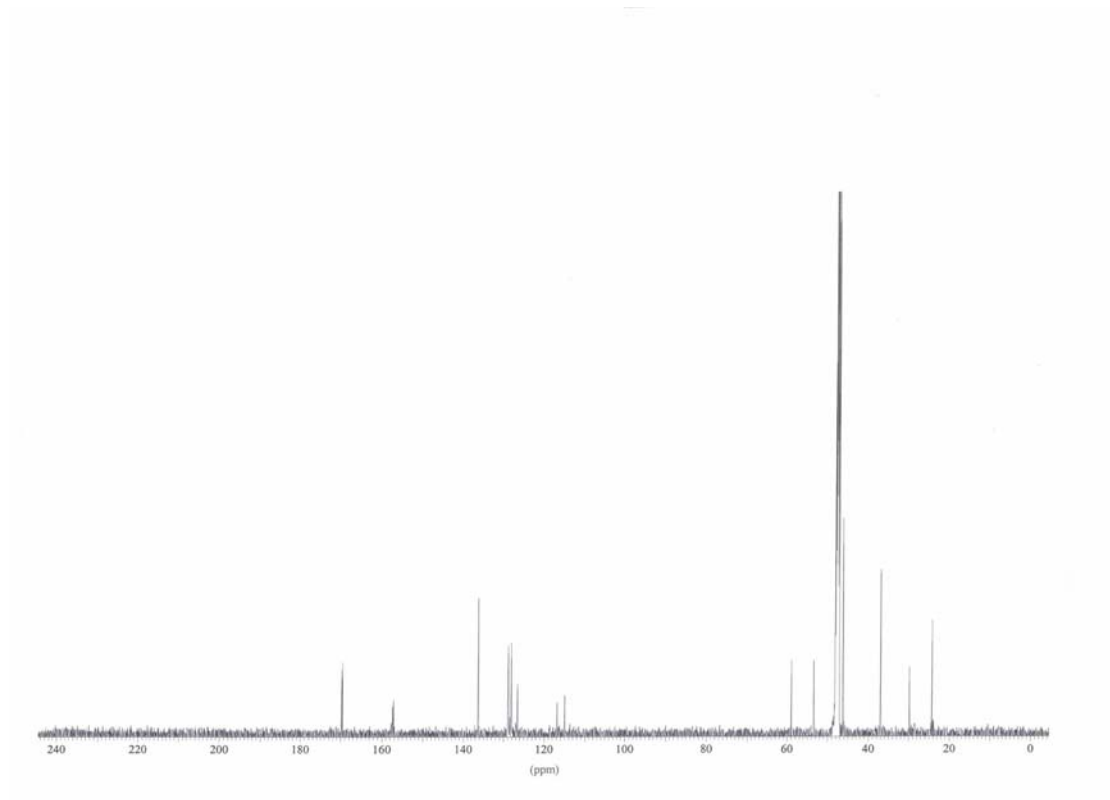

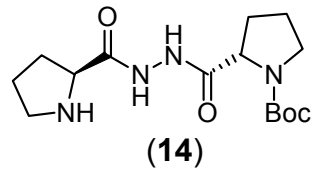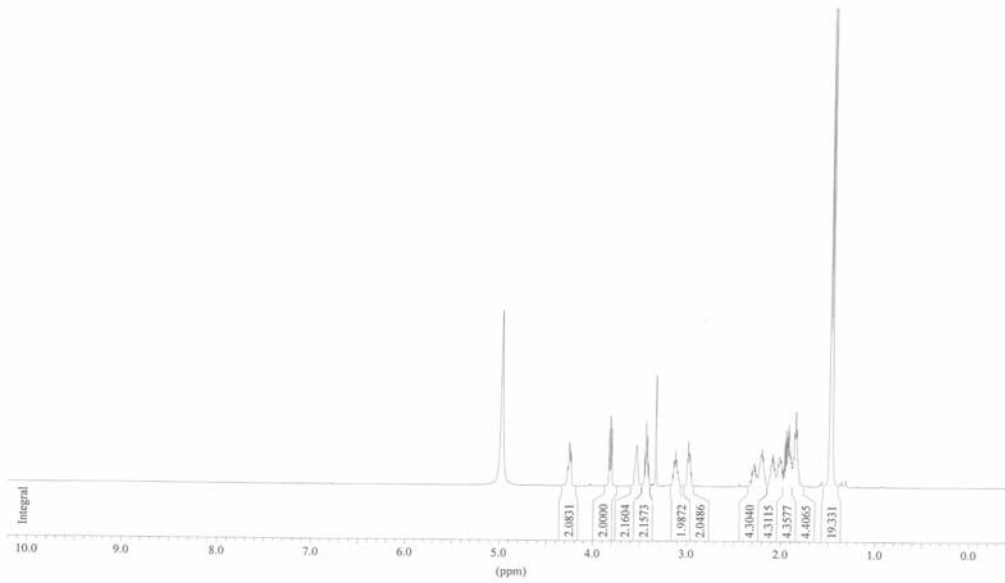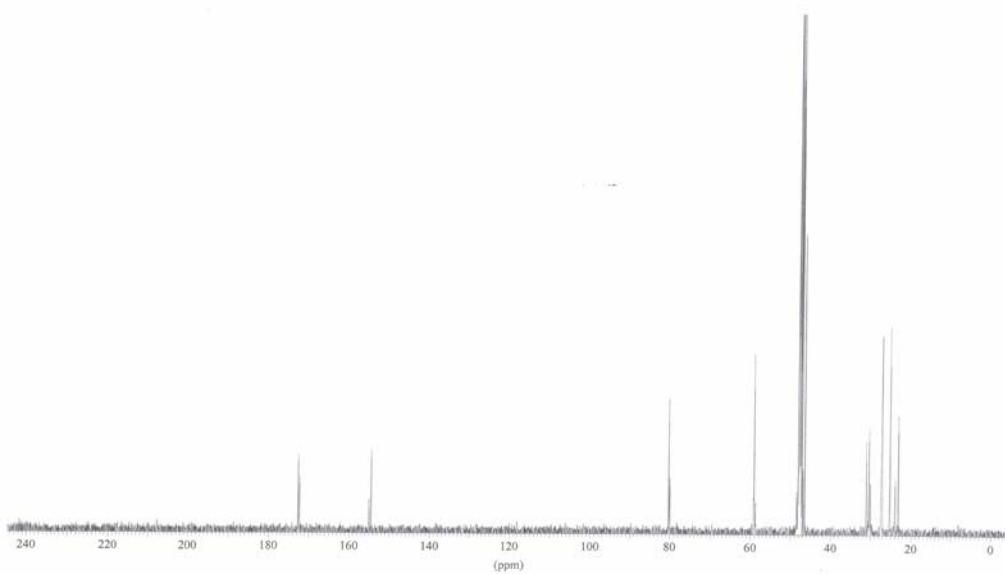

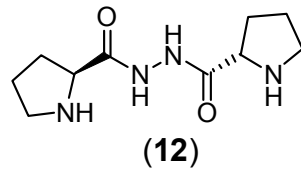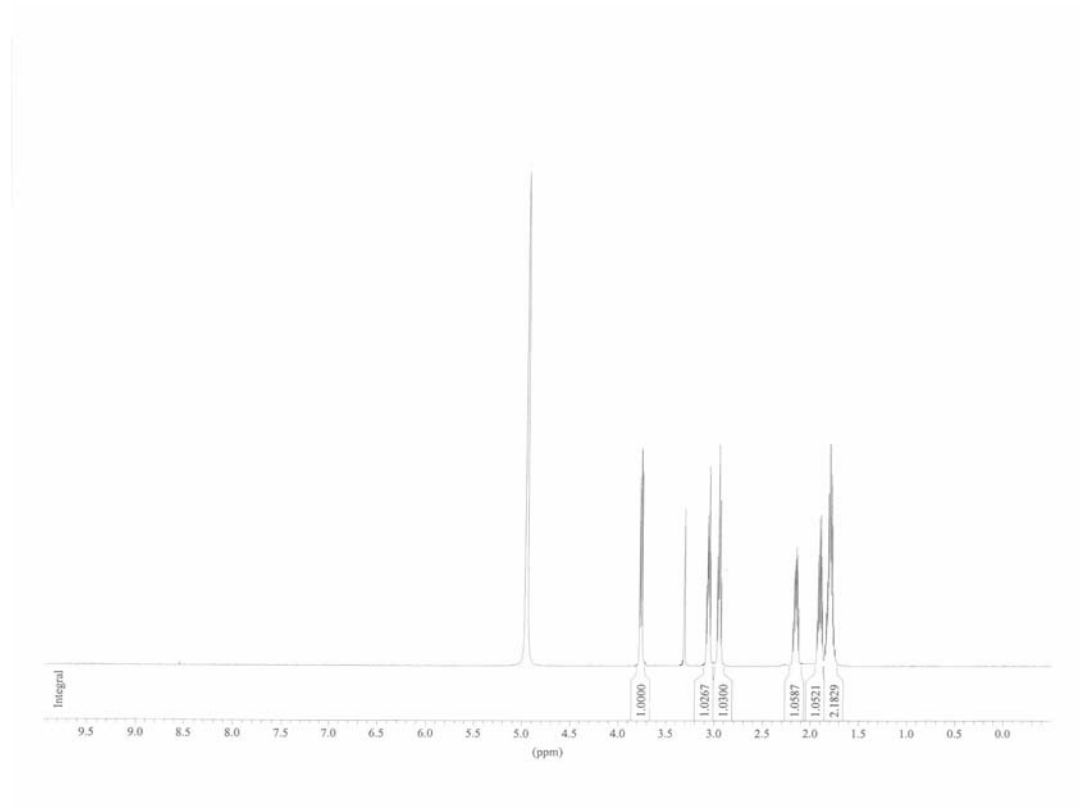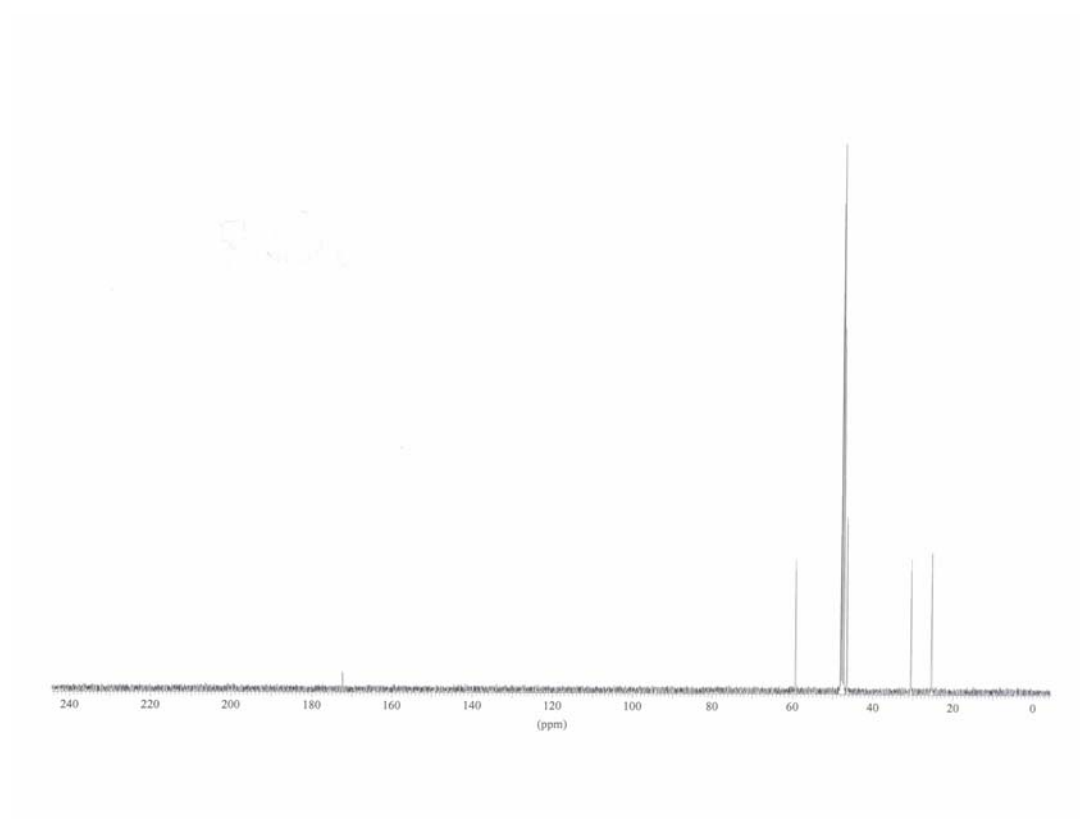



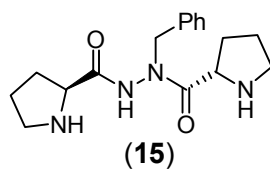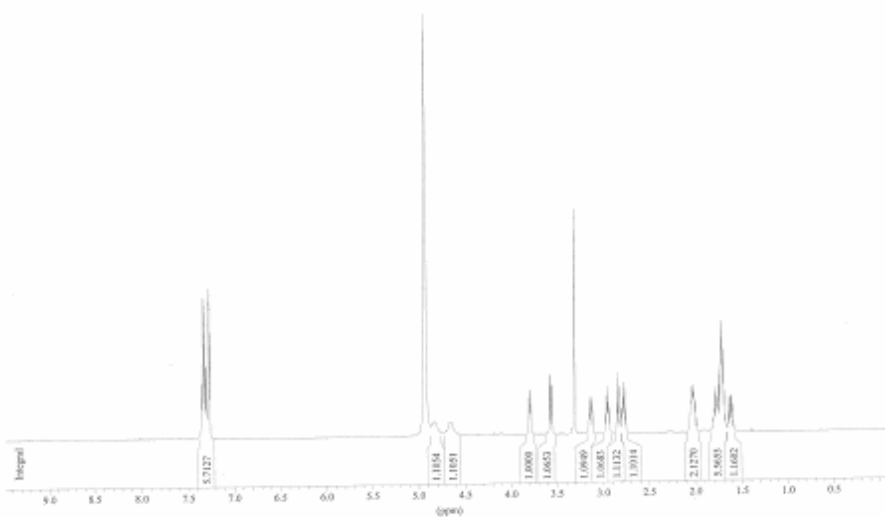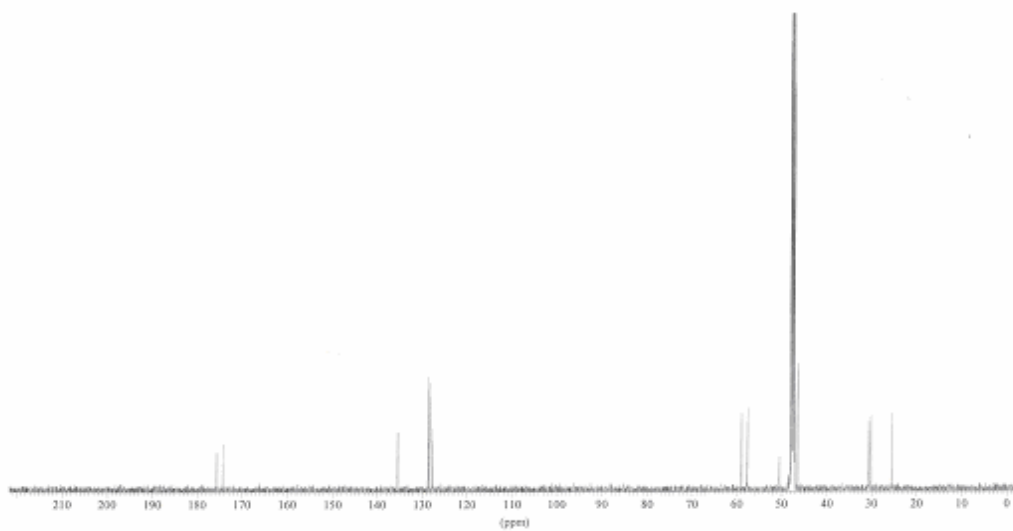

### HPLC spectra of 16a-g

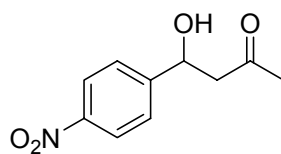

(16a )Racemic

Software Version : 6.2.1.0.104:0104  
Sample Name :  
Instrument Name : HPLC  
Rack/Vial : 0/0  
Sample Amount : 1.000000  
Cycle : 1

Date : 2005-6-30 9:24:03  
Data Acquisition Time : 2004-1-18 17:39:04  
Channel : A  
Operator : manager  
Dilution Factor : 1.000000

Result File : D:\LC\wy\as30\2004-10\041018-h2o-ac.rst  
Sequence File : C:\PenExe\TcWS\Ver6.2.1\Examples\041018-h2o-ac.seq

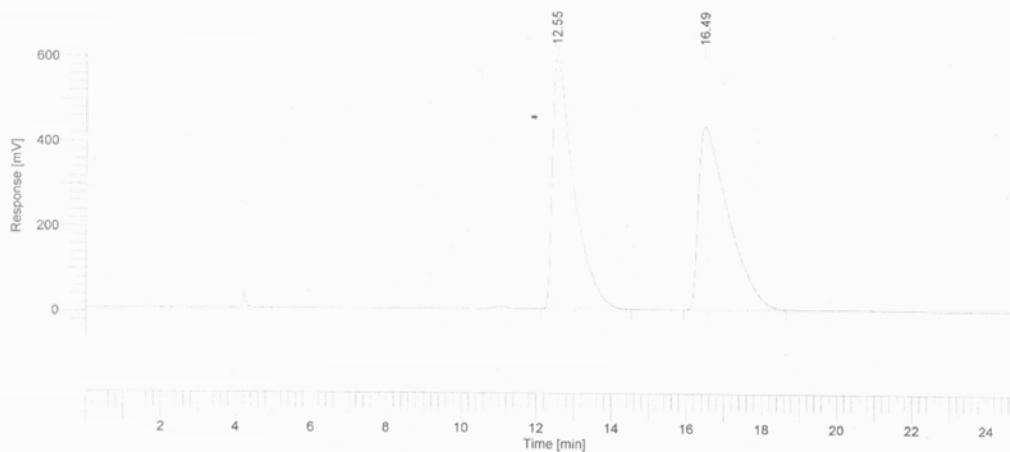

## REPORT

| Peak # | Time [min] | Area [uV*sec] | Height [uV] | Area [%] |
|--------|------------|---------------|-------------|----------|
| 1      | 12.553     | 23400616.30   | 596740.41   | 49.61    |
| 2      | 16.491     | 23773233.27   | 429812.05   | 50.39    |
|        |            | 47173849.57   | 1.03e+06    | 100.00   |

Missing Component Report  
Component Expected Retention (Calibration File)

All components were found

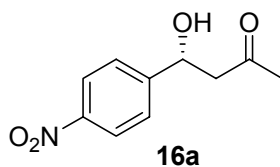

Enantiomeric excess: 96%, determined by HPLC (Daicel Chiralpak AS-H, i-PrOH/Hexane = 30/70), UV 254 nm, flow rate 1.0 mL/min. *R*-isomer,  $t_R$  13.4 min and *S*-isomer,  $t_R$  18.6.

|                                     |                                           |
|-------------------------------------|-------------------------------------------|
| Software Version : 6.2.1.0.104:0104 | Date : 2005-5-23 16:46:53                 |
| Sample Name : ccl                   | Data Acquisition Time : 2005-3-3 12:06:50 |
| Instrument Name : HPLC              | Channel : A                               |
| Rack/Vial : 0/0                     | Operator : manager                        |
| Sample Amount : 1.000000            | Dilution Factor : 1.000000                |
| Cycle : 1                           |                                           |

Result File : D:\LC\ccl\4-OH-4-(4'-NO2Ph)-butan-2-one\2005-3\050303.rst  
 Sequence File : C:\PenExe\TcWS\Ver6.2.1\Examples\050303-7-48-2.seq

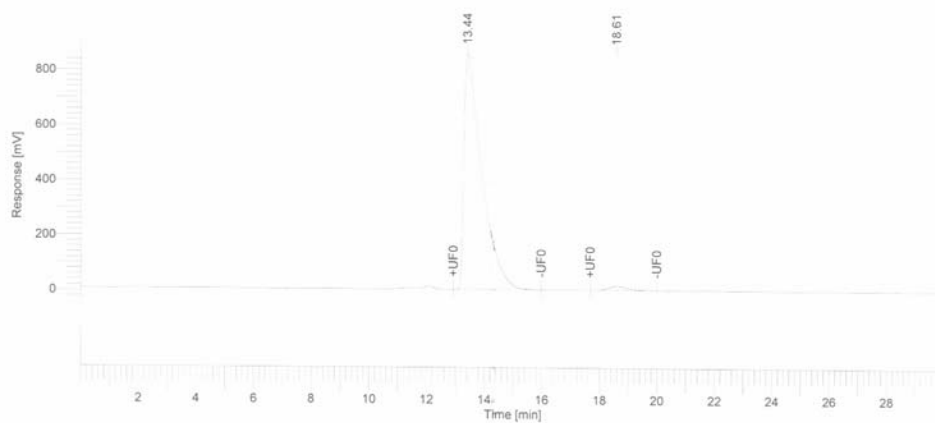

## REPORT

| Peak # | Time [min] | Area [uV*sec] | Height [uV] | Area [%] |
|--------|------------|---------------|-------------|----------|
| 1      | 13.435     | 36720469.19   | 852191.13   | 98.17    |
| 2      | 18.605     | 685062.02     | 15154.17    | 1.83     |
|        |            | 37405531.22   | 867345.30   | 100.00   |

Missing Component Report  
 Component Expected Retention (Calibration File)

All components were found

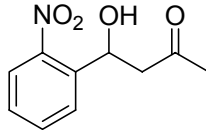

**(16b) Racemic**

Software Version : 6.2.1.0.104:0104  
 Sample Name : ccl  
 Instrument Name : HPLC  
 Rack/Vial : 0/0  
 Sample Amount : 1.000000  
 Cycle : 1

Date : 2005-6-30 9:29:22  
 Data Acquisition Time : 2005-3-2 10:54:09  
 Channel : A  
 Operator : manager  
 Dilution Factor : 1.000000

Result File : D:\LC\ccl\4-OH-4-(2'-NO2Ph)-butan-2-one\050302-7-45-2xx.rst  
 Sequence File : C:\PenExe\TcWS\Ver6.2.1\Examples\050302-7-45-2-20050302-104752.seq

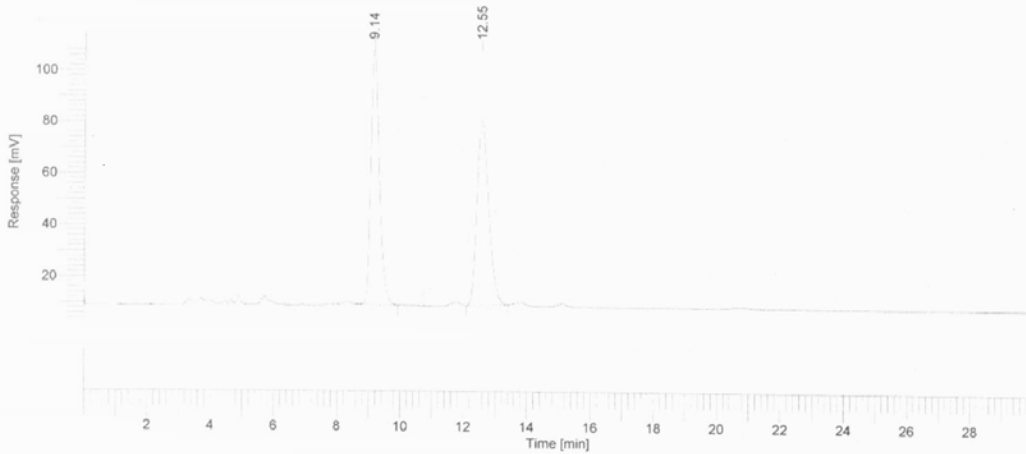

## REPORT

| Peak # | Time [min] | Area [uV*sec] | Height [uV] | Area [%] |
|--------|------------|---------------|-------------|----------|
| 1      | 9.138      | 1843028.46    | 98589.76    | 50.11    |
| 2      | 12.553     | 1834727.19    | 71195.47    | 49.89    |
|        |            | 3677755.65    | 169785.23   | 100.00   |

Missing Component Report  
 Component Expected Retention (Calibration File)

All components were found

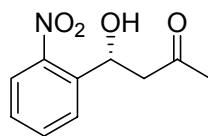

**16b**

Enantiomeric excess: 96%, determined by HPLC (Daicel Chiralpak AS-H, i-PrOH/Hexane = 30/70), UV 254 nm, flow rate 1.0 mL/min. *R*-isomer,  $t_R$  12.1 min and *S*-isomer,  $t_R$  9.2.

Software Version : 6.2.1.0.104:0104  
 Sample Name : ccl  
 Instrument Name : HPLC  
 Rack/Vial : 0/0  
 Sample Amount : 1.000000  
 Cycle : 1  
 Date : 2005-5-23 16:55:50  
 Data Acquisition Time : 2005-3-2 12:01:04  
 Channel : A  
 Operator : manager  
 Dilution Factor : 1.000000

Result File : D:\LC\ccl\4-OH-4-(2'-NO2Ph)-butan-2-one\050302.rst  
 Sequence File : C:\PenExe\TcWS\Ver6.2.1\Examples\050302-7-50-5.seq

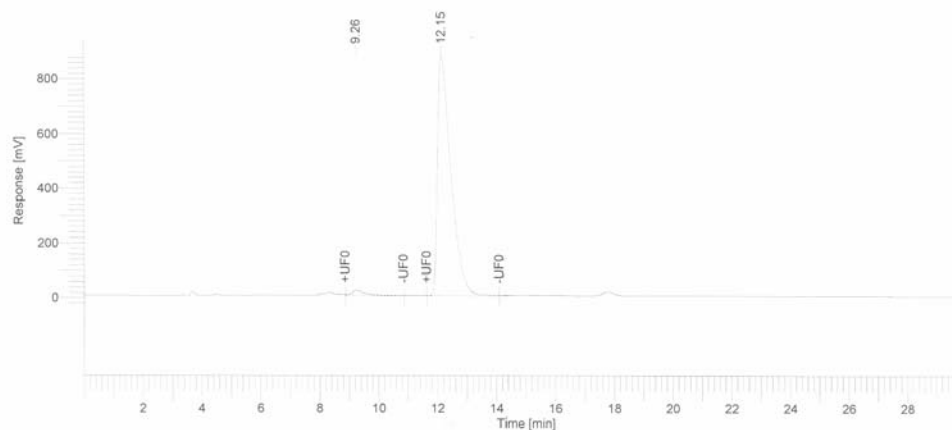

## REPORT

| Peak # | Time [min] | Area [uV*sec] | Height [uV] | Area [%] |
|--------|------------|---------------|-------------|----------|
| 1      | 9.255      | 573781.54     | 19816.67    | 2.01     |
| 2      | 12.152     | 27956671.68   | 881977.82   | 97.99    |
|        |            | 28530453.22   | 901794.49   | 100.00   |

Missing Component Report  
 Component Expected Retention (Calibration File)

All components were found

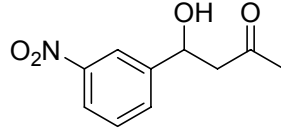

**(16c) Racemic**

Software Version : 6.2.1.0.104:0104  
 Sample Name : ccl  
 Instrument Name : HPLC  
 Rack/Vial : 0/0  
 Sample Amount : 1.000000  
 Cycle : 1

Date : 2005-6-30 9:37:10  
 Data Acquisition Time : 2005-3-2 14:48:04  
 Channel : A  
 Operator : manager  
 Dilution Factor : 1.000000

Result File : D:\LC\ccl\4-OH-4-(3'-NO2Ph)-butan-2-one\050302-7-45-1xx.rst  
 Sequence File : C:\PenExe\TcWS\Ver6.2.1\Examples\050302-7-45-1xx.seq

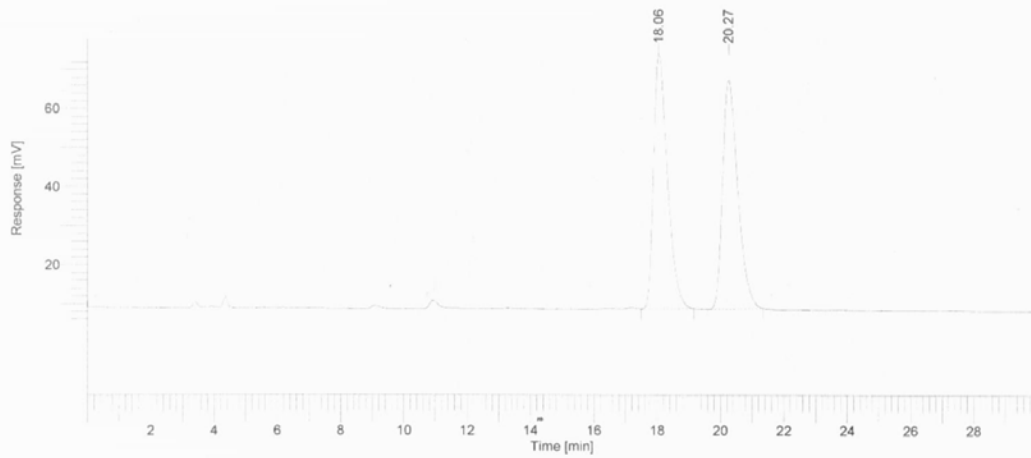

## REPORT

| Peak # | Time [min] | Area [uV*sec] | Height [uV] | Area [%] |
|--------|------------|---------------|-------------|----------|
| 1      | 18.063     | 1994478.81    | 65312.99    | 50.50    |
| 2      | 20.269     | 1955125.98    | 58671.40    | 49.50    |
|        |            | 3949604.79    | 123984.40   | 100.00   |

### Missing Component Report

| Component    | Expected Retention (Calibration File) |
|--------------|---------------------------------------|
| PE serise200 | 0.001                                 |

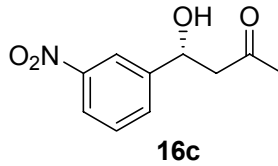

Enantiomeric excess: 96%, determined by HPLC (Daicel Chiralpak OJ-H, i-PrOH/Hexane = 20/80), UV 254 nm, flow rate 1.0 mL/min. *R*-isomer,  $t_R$  17.6, min and *S*-isomer,  $t_R$  20.3.

|                                     |                                           |
|-------------------------------------|-------------------------------------------|
| Software Version : 6.2.1.0.104:0104 | Date : 2005-5-23 17:00:30                 |
| Sample Name : ccl                   | Data Acquisition Time : 2005-3-2 15:58:36 |
| Instrument Name : HPLC              | Channel : A                               |
| Rack/Vial : 0/0                     | Operator : manager                        |
| Sample Amount : 1.000000            | Dilution Factor : 1.000000                |
| Cycle : 1                           |                                           |

Result File : D:\LC\ccl\4-OH-4-(3'-NO2Ph)-butan-2-one\050302.rst  
 Sequence File : C:\PenExe\TcWS\Ver6.2.1\Examples\050302-7-45-1XX-20050302-155628.seq

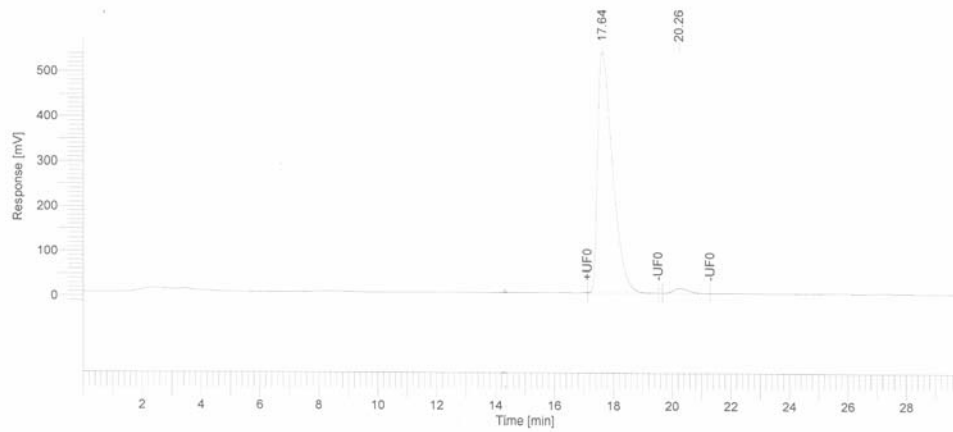

## REPORT

| Peak # | Time [min] | Area [uV*sec] | Height [uV] | Area [%] |
|--------|------------|---------------|-------------|----------|
| 1      | 17.643     | 19007133.73   | 535886.93   | 97.98    |
| 2      | 20.260     | 391466.35     | 11294.89    | 2.02     |
|        |            | 19398600.09   | 547181.82   | 100.00   |

Missing Component Report

| Component    | Expected Retention (Calibration File) |
|--------------|---------------------------------------|
| PE serise200 | 0.001                                 |

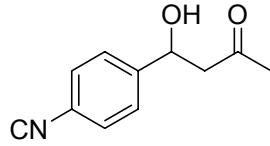

**(16d) Racemic**

Software Version : 6.2.1.0.104:0104  
 Sample Name : ccl  
 Instrument Name : HPLC  
 Rack/Vial : 0/0  
 Sample Amount : 1.000000  
 Cycle : 1

Date : 2005-6-30 9:46:17  
 Data Acquisition Time : 2005-3-3 16:18:49  
 Channel : A  
 Operator : manager  
 Dilution Factor : 1.000000

Result File : D:\LC\ccl\4-OH-4-(4'-CNPh)-butan-2-one\050303-7-45-5xx.rst  
 Sequence File : C:\PenExe\TcWS\Ver6.2.1\Examples\050303-7-45-5xx.seq

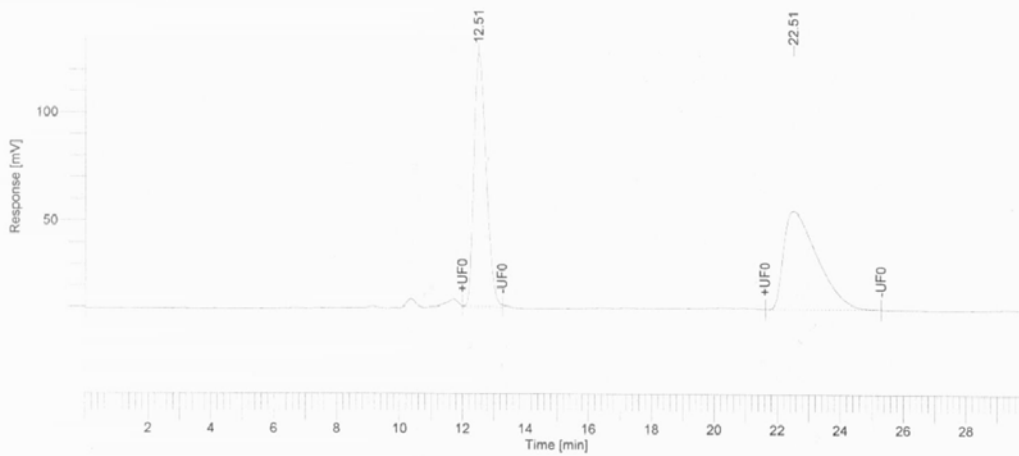

## REPORT

| Peak # | Time [min] | Area [uV*sec] | Height [uV] | Area [%] |
|--------|------------|---------------|-------------|----------|
| 1      | 12.507     | 3157899.87    | 116934.08   | 48.08    |
| 2      | 22.508     | 3410008.99    | 45858.60    | 51.92    |
|        |            | 6567908.86    | 162792.67   | 100.00   |

Missing Component Report  
 Component Expected Retention (Calibration File)

All components were found



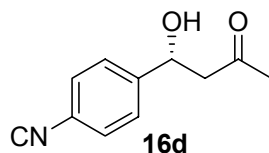

Enantiomeric excess: 92%, determined by HPLC (Daicel Chiralpak AS-H, i-PrOH/Hexane = 30/70), UV 254 nm, flow rate 1.0 mL/min. *R*-isomer,  $t_R$  12.3, min and *S*-isomer,  $t_R$  23.4.

Page 1 of 1

Software Version : 6.2.1.0.104:0104  
 Sample Name : ccl  
 Instrument Name : HPLC  
 Rack/Vial : 0/0  
 Sample Amount : 1.000000  
 Cycle : 1  
 Date : 2005-5-23 16:52:09  
 Data Acquisition Time : 2005-3-3 16:53:54  
 Channel : A  
 Operator : manager  
 Dilution Factor : 1.000000

Result File : D:\LC\cc\4-OH-4-(4'-CNPh)-butan-2-one\050303.rst  
 Sequence File : C:\PenExe\TcWS\Ver6.2.1\Examples\050303-7-50-7.seq

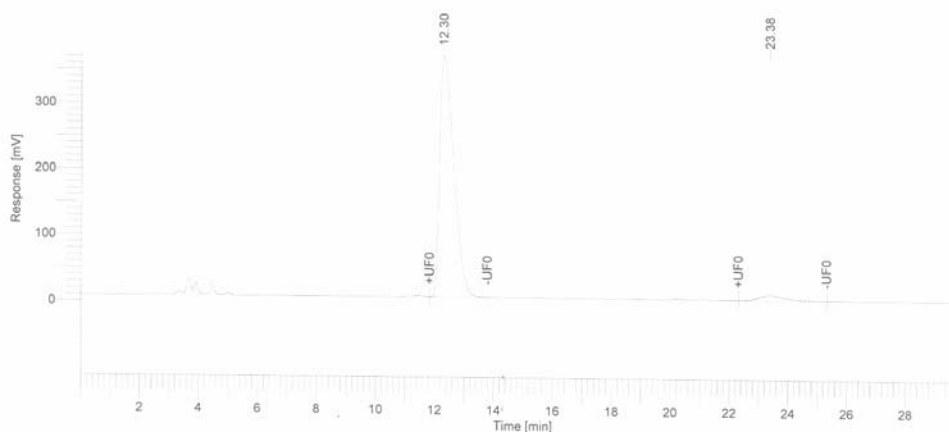

## REPORT

| Peak # | Time [min] | Area [uV*sec] | Height [uV] | Area [%] |
|--------|------------|---------------|-------------|----------|
| 1      | 12.297     | 12188228.75   | 363823.08   | 96.20    |
| 2      | 23.375     | 481727.00     | 7644.19     | 3.80     |
|        |            | 12669955.76   | 371467.27   | 100.00   |

Missing Component Report  
 Component Expected Retention (Calibration File)

All components were found

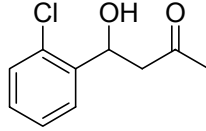

**(16e )Racemic**

Software Version : 6.2.1.0.104:0104  
 Sample Name : ccl  
 Instrument Name : HPLC  
 Rack/Vial : 0/0  
 Sample Amount : 1.000000  
 Cycle : 1

Date : 2005-6-30 17:54:20  
 Data Acquisition Time : 2005-6-20 15:59:13  
 Channel : A  
 Operator : manager  
 Dilution Factor : 1.000000

Result File : D:\LC\ccl\4-OH-4-(2'-ClPh)-butan-2-one\2005\050620-11-4-2.rst  
 Sequence File : C:\PenExe\TcWS\Ver6.2.1\Examples\050620-10-44-1-20050620-155658.seq

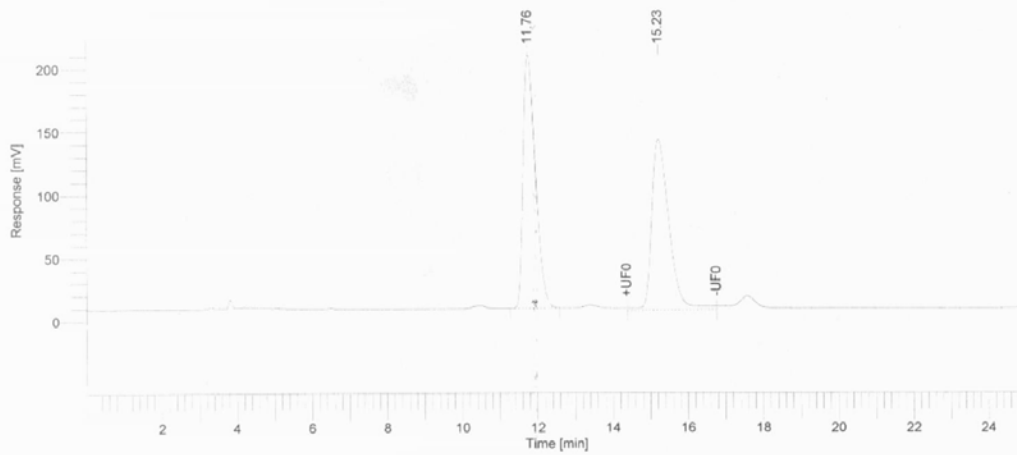

## REPORT

| Peak # | Time [min] | Area [uV*sec] | Height [uV] | Area [%] |
|--------|------------|---------------|-------------|----------|
| 1      | 11.760     | 4557925.99    | 200657.64   | 51.26    |
| 2      | 15.227     | 4334687.92    | 135058.81   | 48.74    |
|        |            | 8892613.91    | 335716.45   | 100.00   |

### Missing Component Report

Component Expected Retention (Calibration File)

PE serise200 0.001

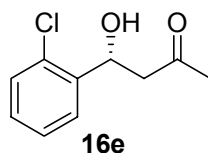

Enantiomeric excess: 96%, determined by HPLC (Daicel Chiralpak AS-H, i-PrOH/Hexane = 8/92), UV 262 nm, flow rate 1.0 mL/min. *R*-isomer,  $t_R$  16.2, min and *S*-isomer,  $t_R$  12.8.

Software Version : 6.2.1.0.104:0104      Date : 2005-5-23 16:58:03  
 Sample Name : ccl      Data Acquisition Time : 2005-3-7 9:42:32  
 Instrument Name : HPLC      Channel : A  
 Rack/Vial : 0/0      Operator : manager  
 Sample Amount : 1.000000      Dilution Factor : 1.000000  
 Cycle : 1

Result File : D:\LC\ccl\4-OH-4-(2'-ClPh)-butan-2-one\050307.rst  
 Sequence File : C:\PenExe\TcWS\Ver6.2.1\Examples\050307-7-50-2.seq

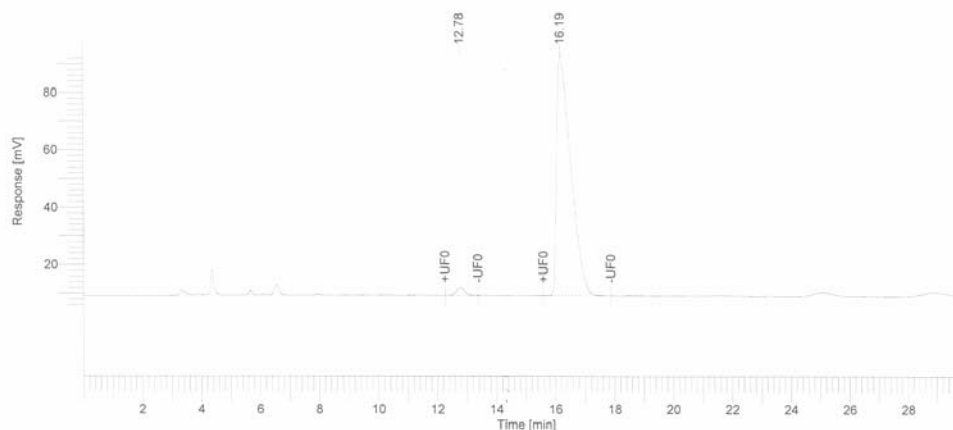

## REPORT

| Peak # | Time [min] | Area [uV*sec] | Height [uV] | Area [%] |
|--------|------------|---------------|-------------|----------|
| 1      | 12.778     | 52770.44      | 2766.27     | 1.85     |
| 2      | 16.193     | 2792474.65    | 83750.86    | 98.15    |
|        |            | 2845245.10    | 86517.14    | 100.00   |

Missing Component Report

| Component    | Expected Retention (Calibration File) |
|--------------|---------------------------------------|
| PE-SERISE200 | 0.001                                 |

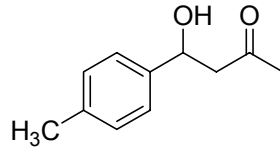

(16f)-Racemic

Software Version : 6.2.1.0.104:0104  
 Sample Name : ccl  
 Instrument Name : HPLC  
 Rack/Vial : 0/0  
 Sample Amount : 1.000000  
 Cycle : 1

Date : 2005-6-30 9:51:53  
 Data Acquisition Time : 2005-3-9 18:20:24  
 Channel : A  
 Operator : manager  
 Dilution Factor : 1.000000

Result File : D:\LC\cc\14-OH-4-(4-CH3Ph)-butan-2-one\050309  
 Sequence File : C:\PenExe\TcWS\Ver6.2.1\Examples\050309-7-45-6xx.seq

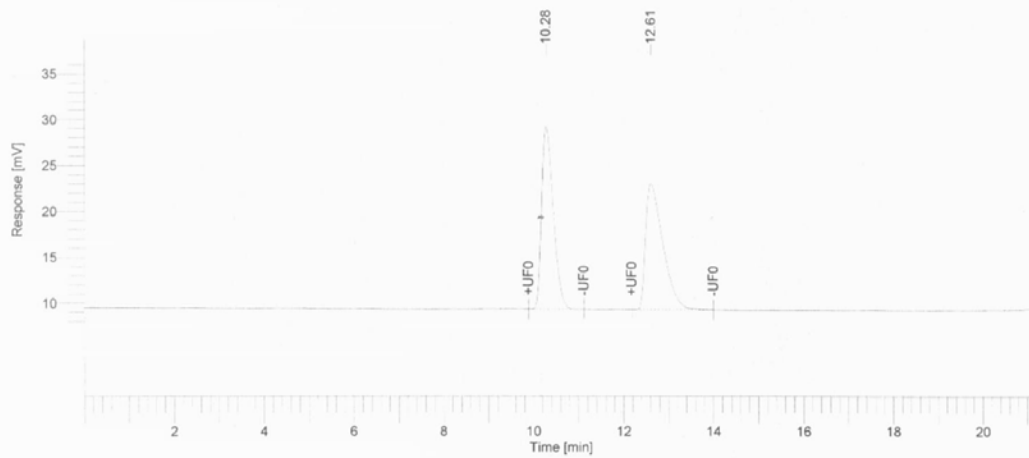

### DEFAULT REPORT

| Peak # | Time [min] | Area [uV*sec] | Height [uV] | Area [%] |
|--------|------------|---------------|-------------|----------|
| 1      | 10.280     | 358545.15     | 19854.25    | 49.37    |
| 2      | 12.610     | 367639.71     | 13653.70    | 50.63    |
|        |            | 726184.85     | 33507.96    | 100.00   |

#### Missing Component Report

| Component    | Expected Retention (Calibration File) |
|--------------|---------------------------------------|
| PE serise200 | 0.001                                 |

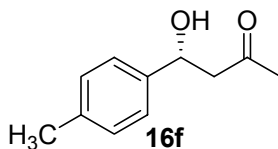

Enantiomeric excess: 87%, determined by HPLC (Daicel Chiralpak AS-H, i-PrOH/Hexane = 15/85), UV 257 nm, flow rate 1.0 mL/min. *R*-isomer,  $t_R$  10.2, min and *S*-isomer,  $t_R$  12.9.

Software Version : 6.2.1.0.104:0104  
 Sample Name : ccl  
 Instrument Name : HPLC  
 Rack/Vial : 0/0  
 Sample Amount : 1.000000  
 Cycle : 1  
 Date : 2005-5-23 17:07:06  
 Data Acquisition Time : 2005-3-10 9:08:00  
 Channel : A  
 Operator : manager  
 Dilution Factor : 1.000000

Result File : D:\LC\ccl\4-OH-4-(4-CH3Ph)-butan-2-one\050310.rst  
 Sequence File : C:\PenExe\TcWS\Ver6.2.1\Examples\050310-8-1-1.seq

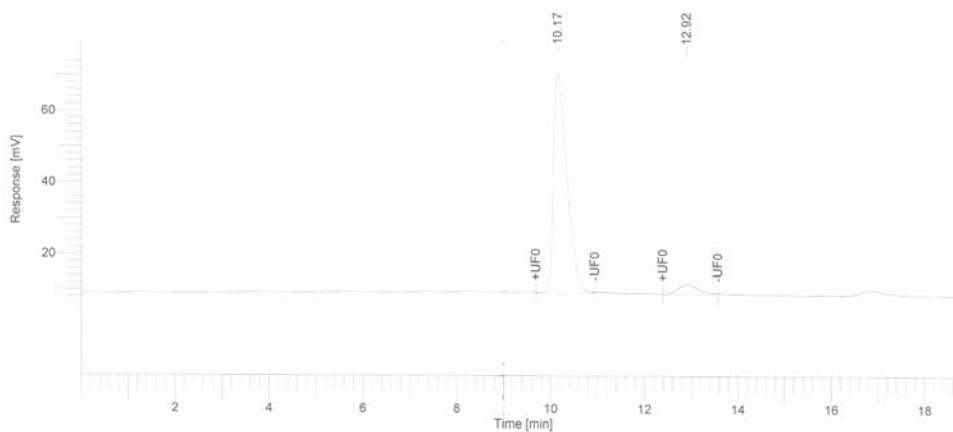

### DEFAULT REPORT

| Peak # | Time [min] | Area [uV*sec] | Height [uV] | Area [%] |
|--------|------------|---------------|-------------|----------|
| 1      | 10.168     | 1221885.08    | 61058.87    | 93.62    |
| 2      | 12.918     | 83329.05      | 2777.57     | 6.38     |
|        |            | 1305214.13    | 63836.43    | 100.00   |

Missing Component Report

| Component    | Expected Retention (Calibration File) |
|--------------|---------------------------------------|
| PE serise200 | 0.001                                 |

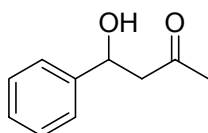

**(16g )Racemic**

Software Version : 6.2.1.0.104:0104  
 Sample Name : ccl  
 Instrument Name : HPLC  
 Rack/Vial : 0/0  
 Sample Amount : 1.000000  
 Cycle : 1

Date : 2005-6-30 10:00:28  
 Data Acquisition Time : 2005-3-10 9:30:58  
 Channel : A  
 Operator : manager  
 Dilution Factor : 1.000000

Result File : D:\LC\cc\4-OH-4-Ph-butan-2-one\050310  
 Sequence File : C:\PenExe\TcWS\Ver6.2.1\Examples\050310-7-43-6xx.seq

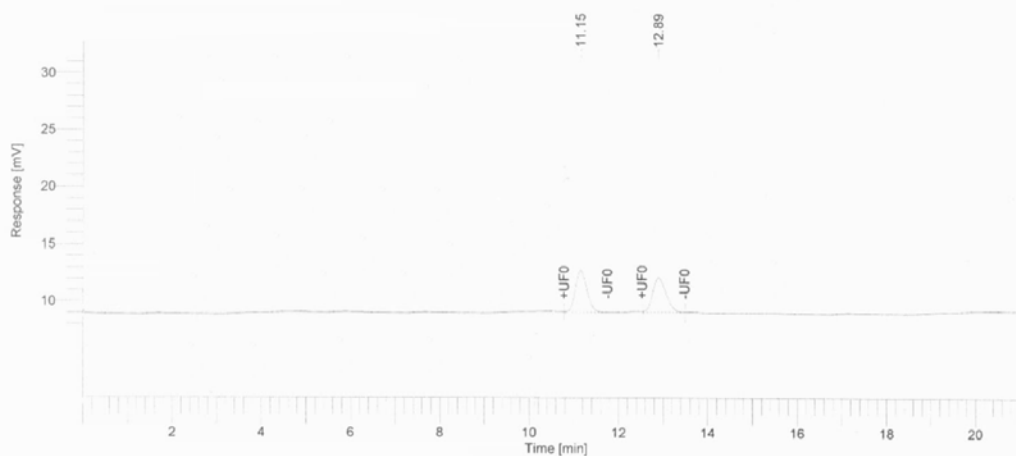

### DEFAULT REPORT

| Peak # | Time [min] | Area [uV*sec] | Height [uV] | Area [%] |
|--------|------------|---------------|-------------|----------|
| 1      | 11.152     | 68360.21      | 3735.33     | 51.46    |
| 2      | 12.893     | 64489.30      | 3072.88     | 48.54    |
|        |            | 132849.51     | 6808.21     | 100.00   |

Missing Component Report  
 Component Expected Retention (Calibration File)

|              |       |
|--------------|-------|
| PE serise200 | 0.001 |
|--------------|-------|

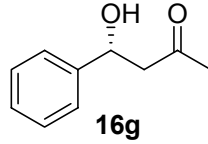

Enantiomeric excess: 90%, determined by HPLC (Daicel Chiralpak AS-H, i-PrOH/Hexane = 15/85), UV 257 nm, flow rate 1.0 mL/min. *R*-isomer,  $t_R$  10.9, min and *S*-isomer,  $t_R$  12.8.

Software Version : 6.2.1.0.104:0104 Date : 2005-5-23 17:03:29  
 Sample Name : ccl Data Acquisition Time : 2005-3-10 9:57:24  
 Instrument Name : HPLC Channel : A  
 Rack/Vial : 0/0 Operator : manager  
 Sample Amount : 1.000000 Dilution Factor : 1.000000  
 Cycle : 1

Result File : D:\LC\cel\4-OH-4-Ph-butan-2-one\050310.rst  
 Sequence File : C:\PenExe\TcWS\Ver6.2.1\Examples\050310-8-4-6.seq

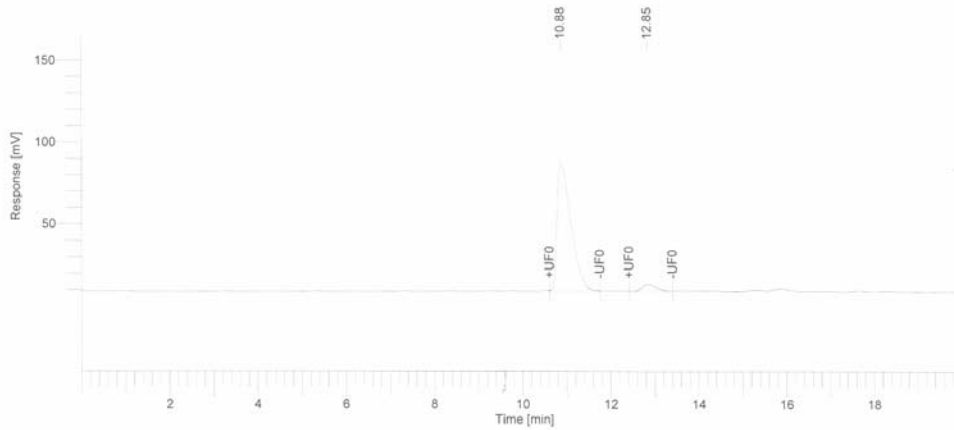

### DEFAULT REPORT

| Peak # | Time [min] | Area [uV*sec] | Height [uV] | Area [%] |
|--------|------------|---------------|-------------|----------|
| 1      | 10.880     | 1738107.56    | 79010.38    | 95.00    |
| 2      | 12.848     | 91500.15      | 4268.42     | 5.00     |
|        |            | 1829607.71    | 83278.81    | 100.00   |

Missing Component Report

| Component    | Expected Retention (Calibration File) |
|--------------|---------------------------------------|
| PE serise200 | 0.001                                 |

**X-ray analysis.** Single crystal diffraction data were measured by an Enraf-Nonius CCD single-crystal x-ray diffractometer at 286K. Intensity data were collected with a Siemens P4 four-circle diffractometer with a graphite-monochromated MoK $\alpha$  ( $\lambda = 0.71073 \text{ \AA}$ ) radiation. The structure was solved by direct methods using SHELX-97 and refined by full-matrix least-squares with SHELX-97.

**Crystal data for 12:** C<sub>10</sub>H<sub>18</sub>N<sub>4</sub>O<sub>2</sub> (286K). M = 226.28, orthorhombic, space group P2<sub>1</sub>2<sub>1</sub>2<sub>1</sub>,  $a = 9.705 (1) \text{ \AA}$ ,  $b = 7.660 (1) \text{ \AA}$ ,  $c = 7.818 (1) \text{ \AA}$ ,  $\alpha = \beta = \gamma = 90^\circ$ ,  $V = 581.23 (17) \text{ \AA}^3$ ,  $Z = 2$ ,  $\rho_{\text{calc}} = 1.293 \text{ mg/m}^3$ , absorption coefficient =  $0.093 \text{ mm}^{-1}$ , F (000) = 244, total reflections collected 939, unique 823 ( $R_{\text{int}} = 0.0095$ ), final R indices [ $I > 2\sigma(1)$ ] were  $R_1 = 0.0351$ ,  $wR_2 = 0.0751$ .

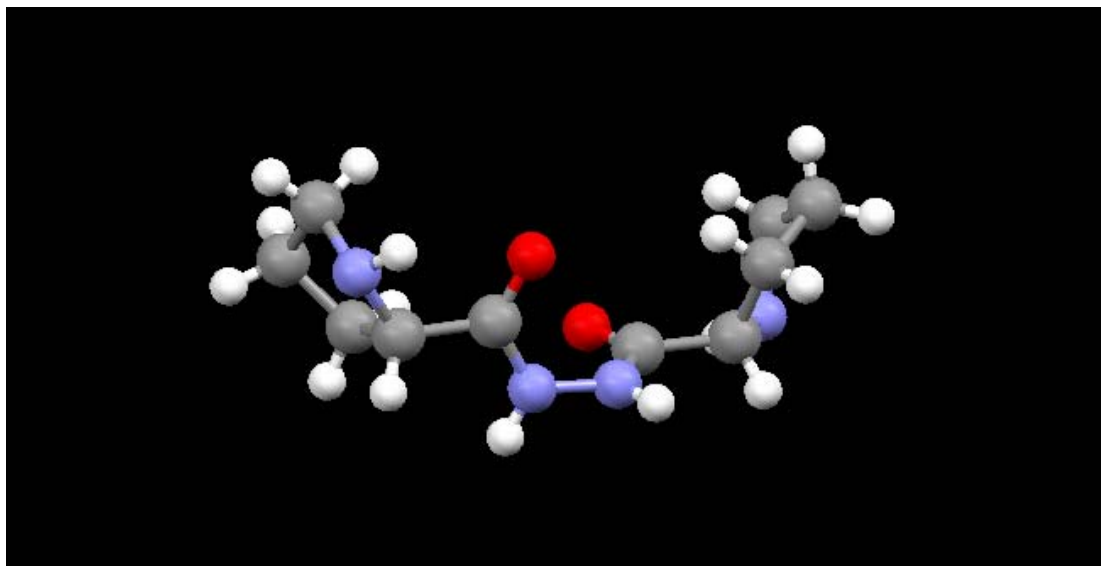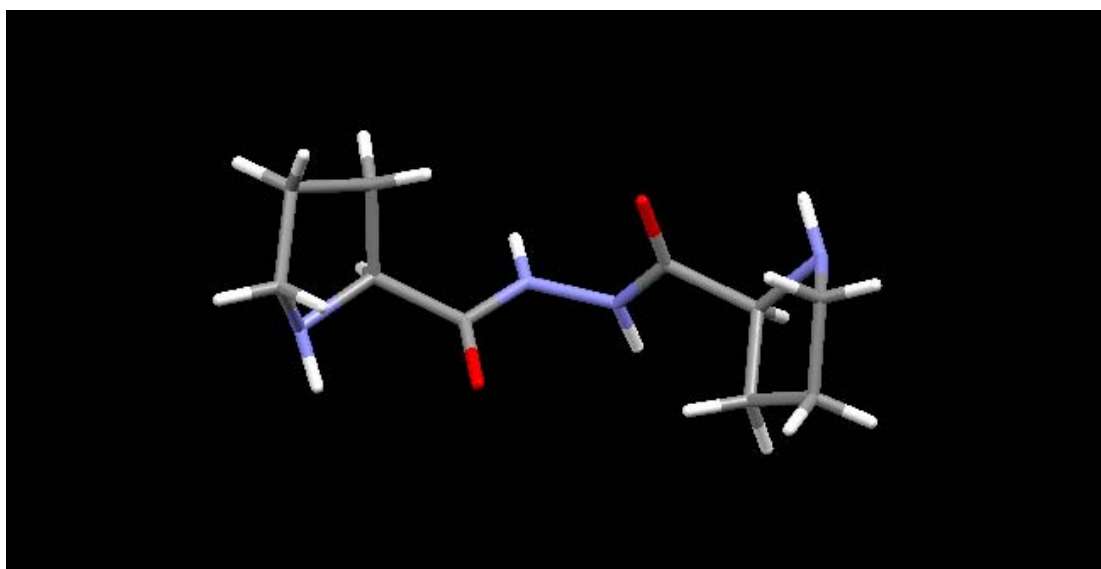



## Calculations:

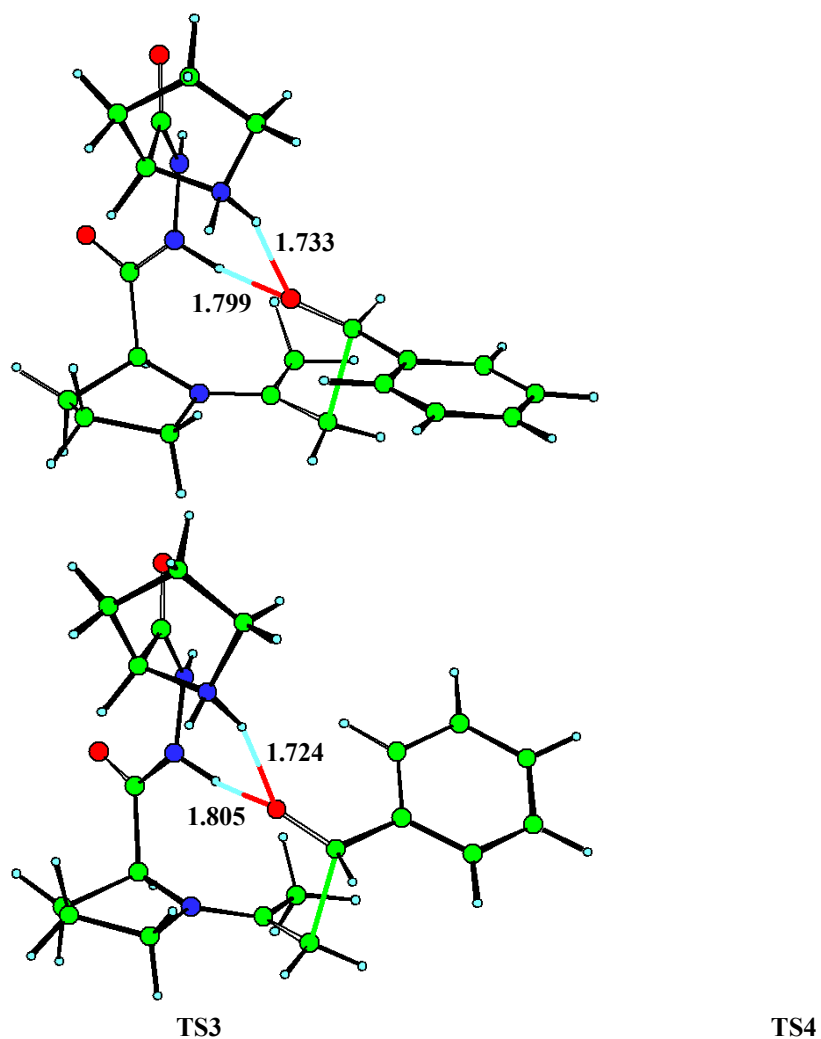

**Figure S1.** The optimized transition structures for the aldol reaction of benzaldehyde with acetone catalyzed by **12**.

The resulting Cartesian coordinates for the four transition structures **TS1**, **TS2**, **TS3** and **TS4**, as well as the enamine intermediate **E1** and **E2** formed by the condensation of acetone with, respectively, catalyst **15** and **12**:

### Structure of TS1:

|   |             |             |            |
|---|-------------|-------------|------------|
| C | 0.52787100  | 0.20104600  | 3.35720400 |
| N | -0.02648300 | -0.92083100 | 2.57070600 |
| C | -1.47989200 | -1.02351400 | 2.75073600 |
| C | -1.71178600 | -0.30554700 | 4.08350300 |
| C | -0.69134800 | 0.83170200  | 4.03471900 |
| C | -2.32195400 | -0.38435500 | 1.63380400 |
| O | -3.50846400 | -0.31850100 | 1.75417900 |
| N | -1.64431400 | 0.05687200  | 0.54559200 |
| C | 0.74185700  | -1.79141100 | 1.93547000 |
| C | 2.09542000  | -1.53877300 | 1.68216500 |

|   |             |             |             |
|---|-------------|-------------|-------------|
| C | 1.94437000  | -0.51210600 | -0.04635900 |
| O | 1.08337900  | 0.41153600  | 0.11442900  |
| C | 0.11003000  | -3.02969000 | 1.35782900  |
| C | 3.38832100  | -0.15339100 | -0.23364300 |
| C | 4.23613200  | -1.01975900 | -0.91067800 |
| C | 5.56389800  | -0.68345500 | -1.12014600 |
| C | 6.05360600  | 0.52395200  | -0.65072600 |
| C | 5.21154000  | 1.39537900  | 0.02600700  |
| C | 3.88594900  | 1.05891600  | 0.23036200  |
| N | -2.31740700 | 0.45112700  | -0.58801500 |
| C | -2.14129900 | 1.69595800  | -1.07927300 |
| O | -2.49284400 | 2.02239900  | -2.17895400 |
| C | -1.45780700 | 2.74257400  | -0.18386800 |
| C | -1.90468600 | 4.16427600  | -0.54115600 |
| N | 0.00970400  | 2.79274700  | -0.50763900 |
| C | -3.04126300 | -0.57029400 | -1.35439900 |
| C | -1.00423400 | 4.60569900  | -1.71761500 |
| C | 0.13826800  | 3.57725800  | -1.78257400 |
| C | -2.15435100 | -1.66968300 | -1.89888100 |
| C | -1.06116200 | -1.37804700 | -2.71050500 |
| C | -2.45605300 | -2.99808500 | -1.63505000 |
| C | -0.28237200 | -2.39423900 | -3.23441400 |
| C | -1.68011100 | -4.02110300 | -2.16549900 |
| C | -0.58965900 | -3.72108300 | -2.96134600 |
| H | 0.00872500  | -4.51041100 | -3.37901800 |
| H | -0.62016000 | 5.60441600  | -1.55732500 |
| H | -0.65060300 | -0.06658900 | 0.44232200  |
| H | 1.65171500  | -1.36855100 | -0.64440500 |
| H | 2.69101300  | -2.39430200 | 1.41929100  |
| H | -1.79407600 | -2.05531100 | 2.79933200  |
| H | -1.48192900 | -0.98563700 | 4.89587800  |
| H | -2.73465500 | 0.02239300  | 4.18966700  |
| H | 1.05722000  | 0.88280900  | 2.71136000  |
| H | 1.22372700  | -0.19722300 | 4.08573500  |
| H | -1.07663100 | 1.65472900  | 3.44045900  |
| H | -0.44829900 | 1.22464100  | 5.01293400  |
| H | 2.60844800  | -0.81852500 | 2.28995800  |
| H | 0.83772300  | -3.59052300 | 0.79141600  |
| H | -0.72082800 | -2.79612900 | 0.70514800  |
| H | -0.25514400 | -3.66337200 | 2.15988400  |
| H | 3.85990900  | -1.95771400 | -1.28209700 |
| H | 6.21110900  | -1.35892900 | -1.64912800 |
| H | 7.08341800  | 0.78631400  | -0.81092900 |
| H | 5.59148600  | 2.33239700  | 0.39162200  |

|   |             |             |             |
|---|-------------|-------------|-------------|
| H | 3.23237300  | 1.73119200  | 0.75540500  |
| H | -1.56754500 | 2.50234000  | 0.85927500  |
| H | -1.75091000 | 4.80412900  | 0.32101600  |
| H | -2.95349100 | 4.19419500  | -0.79253900 |
| H | 0.46808900  | 3.29695600  | 0.23469900  |
| H | 0.47542300  | 1.87123600  | -0.51141300 |
| H | -3.53939200 | -0.04813700 | -2.15498300 |
| H | -3.79716000 | -0.98131500 | -0.70199900 |
| H | 0.01397300  | 2.88347400  | -2.59722100 |
| H | 1.12976300  | 4.00203500  | -1.82446700 |
| H | -1.55077000 | 4.60041400  | -2.64771900 |
| H | -0.83351500 | -0.35476900 | -2.95184100 |
| H | -3.30894300 | -3.24118000 | -1.02498200 |
| H | 0.55140000  | -2.15583300 | -3.87034400 |
| H | -1.93422400 | -5.04546200 | -1.96073700 |

Structure of TS2:

|   |             |             |             |
|---|-------------|-------------|-------------|
| C | -2.39250500 | 3.12619900  | 0.38611800  |
| N | -2.11368100 | 2.25082200  | -0.77183800 |
| C | -0.93624000 | 2.72316300  | -1.51284300 |
| C | -0.86298100 | 4.20344100  | -1.12775700 |
| C | -1.29008200 | 4.18727900  | 0.33990000  |
| C | 0.38038400  | 2.00964900  | -1.16434600 |
| O | 1.40421600  | 2.41808300  | -1.62371500 |
| N | 0.28033300  | 0.92579600  | -0.35971800 |
| C | -2.93555200 | 1.28798100  | -1.14752600 |
| C | -3.97338000 | 0.83971100  | -0.31586500 |
| C | -3.03206300 | -0.50651400 | 0.84914900  |
| O | -1.86680900 | -0.07286900 | 1.13389400  |
| C | -2.68027500 | 0.57770000  | -2.45000700 |
| N | 1.37087400  | 0.11262900  | -0.12719900 |
| C | 1.60624800  | -0.25529700 | 1.15862900  |
| O | 2.12192100  | -1.29446000 | 1.45031100  |
| C | 1.24095100  | 0.73389600  | 2.27288900  |
| C | 2.31029500  | 0.75059300  | 3.37261900  |
| N | 0.03790800  | 0.22664600  | 3.01728200  |
| C | 1.79943800  | -0.79826700 | -1.20802600 |
| C | 1.95994700  | -0.42042100 | 4.31789900  |
| C | 0.52385900  | -0.84096600 | 3.95903400  |
| C | -3.18304100 | -1.80180500 | 0.10317600  |
| C | -2.07579400 | -2.44291000 | -0.43392200 |
| C | -4.43145500 | -2.41017000 | 0.00174900  |
| C | -2.21451700 | -3.66016300 | -1.08330700 |
| C | -4.57258100 | -3.62368200 | -0.64458700 |

|   |             |             |             |
|---|-------------|-------------|-------------|
| C | -3.46193900 | -4.25010200 | -1.19365500 |
| C | 3.30330600  | -0.89880200 | -1.34867700 |
| C | 4.05333200  | 0.21642200  | -1.70881600 |
| C | 3.94281900  | -2.11523400 | -1.16470500 |
| C | 5.42232300  | 0.10930100  | -1.87932600 |
| C | 5.31356500  | -2.22444800 | -1.34226800 |
| C | 6.05524100  | -1.11198300 | -1.69881700 |
| H | 7.11830900  | -1.19392200 | -1.83688900 |
| H | -3.56964900 | -5.19513700 | -1.69395700 |
| H | 2.03031000  | -0.11466400 | 5.35333500  |
| H | -0.61042800 | 0.56985000  | -0.05728200 |
| H | -4.74803300 | 0.28084800  | -0.80675000 |
| H | -1.07057000 | 2.59642200  | -2.57654000 |
| H | -1.57645800 | 4.76042300  | -1.72446800 |
| H | 0.12104400  | 4.61287100  | -1.29721800 |
| H | -2.39327900 | 2.54609200  | 1.29573700  |
| H | -3.37154300 | 3.57082500  | 0.25729600  |
| H | -0.45363200 | 3.90039600  | 0.96964000  |
| H | -1.64434800 | 5.14801200  | 0.68882700  |
| H | -4.33615900 | 1.51695200  | 0.43514400  |
| H | -3.34278300 | -0.26708600 | -2.55050300 |
| H | -1.66001400 | 0.22248400  | -2.52459500 |
| H | -2.86252600 | 1.25763200  | -3.27646600 |
| H | 1.01238000  | 1.70845800  | 1.87782200  |
| H | 2.25478200  | 1.69799300  | 3.89767400  |
| H | 3.30307100  | 0.66315000  | 2.95708000  |
| H | -0.33482500 | 0.99317200  | 3.55446200  |
| H | -0.73412800 | -0.06532500 | 2.39417700  |
| H | 1.37171500  | -0.39194800 | -2.11220500 |
| H | 1.37290400  | -1.77948800 | -1.04018200 |
| H | 0.49580700  | -1.77384200 | 3.42244300  |
| H | -0.15461200 | -0.88795100 | 4.79753200  |
| H | 2.62834500  | -1.25350900 | 4.16651200  |
| H | -3.80287600 | -0.38111000 | 1.60241700  |
| H | -1.10455300 | -2.00033800 | -0.32496800 |
| H | -5.29628600 | -1.93518000 | 0.43307800  |
| H | -1.34993800 | -4.15025500 | -1.49331800 |
| H | -5.54096000 | -4.08438700 | -0.71536200 |
| H | 3.56461700  | 1.16205400  | -1.85495800 |
| H | 3.37403300  | -2.97984900 | -0.87238300 |
| H | 5.99431400  | 0.97525200  | -2.16047900 |
| H | 5.79746200  | -3.17359000 | -1.19854400 |

Structure of TS3:

|   |             |             |             |
|---|-------------|-------------|-------------|
| C | 0.08351600  | -2.31718600 | 1.78665100  |
| N | -0.15565700 | -2.57629600 | 0.35043700  |
| C | -1.55571500 | -2.93687100 | 0.09606000  |
| C | -2.06339300 | -3.36275800 | 1.47935900  |
| C | -1.29999300 | -2.43803900 | 2.42754100  |
| C | -2.41113600 | -1.80347000 | -0.48286900 |
| O | -3.53245800 | -2.01448000 | -0.82984000 |
| N | -1.81313600 | -0.58349700 | -0.57632100 |
| C | 0.81698100  | -2.59741400 | -0.54542500 |
| C | 2.09421300  | -2.09210000 | -0.27194900 |
| C | 1.82762700  | -0.15088100 | -0.73436300 |
| O | 0.78021600  | 0.26596400  | -0.14218200 |
| C | 0.49945600  | -3.06056000 | -1.94375900 |
| C | 3.16774700  | 0.37834300  | -0.31986200 |
| C | 4.23000200  | 0.36225600  | -1.21407100 |
| C | 5.46222300  | 0.88032000  | -0.85006500 |
| C | 5.63984200  | 1.41725700  | 0.41436400  |
| C | 4.58165800  | 1.43834900  | 1.31214000  |
| C | 3.35133000  | 0.92407100  | 0.94543900  |
| N | -2.43309700 | 0.39422800  | -1.31718700 |
| C | -2.81503300 | 1.59200600  | -0.81934900 |
| O | -3.46173800 | 2.36431700  | -1.45897600 |
| C | -2.29795200 | 1.97358400  | 0.57682100  |
| C | -2.91965600 | 3.27670300  | 1.07834500  |
| N | -0.84334400 | 2.34637100  | 0.48699000  |
| C | -2.09019100 | 4.40305900  | 0.42114000  |
| C | -0.80888000 | 3.72800500  | -0.10370100 |
| H | -2.86458700 | 0.11598900  | -2.17465800 |
| H | -1.85591200 | 5.18195500  | 1.13407600  |
| H | -0.81284800 | -0.48497700 | -0.50759100 |
| H | 1.76697600  | -0.31646100 | -1.80645400 |
| H | 2.87388600  | -2.40371100 | -0.94348900 |
| H | -1.62946000 | -3.74760100 | -0.61254100 |
| H | -1.78509400 | -4.39595200 | 1.65226200  |
| H | -3.13831800 | -3.28493100 | 1.55426900  |
| H | 0.52742000  | -1.34434200 | 1.91912800  |
| H | 0.76585500  | -3.06877400 | 2.16581600  |
| H | -1.78147900 | -1.46676600 | 2.47492500  |
| H | -1.24281700 | -2.82404300 | 3.43650000  |
| H | 2.40623300  | -2.01191700 | 0.75165700  |
| H | 1.35542800  | -2.92333000 | -2.58685600 |
| H | -0.34045800 | -2.52434800 | -2.36984100 |
| H | 0.25009900  | -4.11654500 | -1.93561900 |
| H | 4.09683600  | -0.04909400 | -2.20023500 |

|   |             |            |             |
|---|-------------|------------|-------------|
| H | 6.27735500  | 0.86756200 | -1.55025100 |
| H | 6.59524700  | 1.81852900 | 0.69929200  |
| H | 4.71936800  | 1.85530900 | 2.29352100  |
| H | 2.52912100  | 0.94004400 | 1.63685900  |
| H | -2.39570800 | 1.14330400 | 1.25827400  |
| H | -2.83379400 | 3.31410400 | 2.15891900  |
| H | -3.96579300 | 3.33415200 | 0.82271100  |
| H | -0.47637600 | 2.37923900 | 1.42522300  |
| H | -0.23559400 | 1.66200000 | 0.01298100  |
| H | -0.81526000 | 3.61382200 | -1.17638100 |
| H | 0.11187700  | 4.20641400 | 0.19299500  |
| H | -2.62960500 | 4.85028000 | -0.39963000 |

Structure of TS4:

|   |             |             |             |
|---|-------------|-------------|-------------|
| C | 0.01032700  | 2.82283700  | -1.70769100 |
| N | 0.65009800  | 2.52119700  | -0.40840800 |
| C | -0.15517300 | 3.02471700  | 0.71111900  |
| C | -1.03826700 | 4.09093000  | 0.05158000  |
| C | -1.30804100 | 3.50388600  | -1.33411600 |
| C | -1.01055600 | 1.95855500  | 1.40502900  |
| O | -1.62931900 | 2.22834400  | 2.38832700  |
| N | -1.01130700 | 0.72205700  | 0.83389600  |
| C | 1.85315000  | 1.98499600  | -0.30932300 |
| C | 2.49482100  | 1.40179100  | -1.41321200 |
| C | 1.74023800  | -0.45712700 | -1.42371700 |
| O | 0.48557500  | -0.39682800 | -1.20369700 |
| C | 2.49950500  | 1.89710600  | 1.04745300  |
| N | -1.55068100 | -0.32375300 | 1.54666000  |
| C | -2.58326400 | -1.07961600 | 1.10211100  |
| O | -3.12668900 | -1.87685200 | 1.80309700  |
| C | -2.97053800 | -0.94593500 | -0.37954200 |
| C | -4.21868000 | -1.76079900 | -0.71707900 |
| N | -1.93224600 | -1.61441800 | -1.23817300 |
| C | -3.71332900 | -3.20467800 | -0.93493500 |
| C | -2.18777800 | -3.09056400 | -1.11794100 |
| C | 2.62884900  | -1.22928200 | -0.48878500 |
| C | 2.15232300  | -1.69207100 | 0.73061600  |
| C | 3.93066500  | -1.54481900 | -0.86784200 |
| C | 2.96812300  | -2.43907700 | 1.56660100  |
| C | 4.74607900  | -2.28995900 | -0.03626400 |
| C | 4.26616700  | -2.73630500 | 1.18713000  |
| H | -1.40485400 | -0.32186500 | 2.53579400  |
| H | 4.89773900  | -3.31779100 | 1.83361200  |
| H | -4.17728700 | -3.65426900 | -1.80230800 |

|   |             |             |             |
|---|-------------|-------------|-------------|
| H | -0.28625600 | 0.45438700  | 0.18833000  |
| H | 3.55530500  | 1.26441200  | -1.31001700 |
| H | 0.46734800  | 3.45172600  | 1.48206500  |
| H | -0.47368400 | 5.01262200  | -0.02980300 |
| H | -1.92912500 | 4.28899500  | 0.62967700  |
| H | -0.12530000 | 1.91423400  | -2.27178900 |
| H | 0.65687800  | 3.48970700  | -2.26522400 |
| H | -2.11102700 | 2.77603500  | -1.28468700 |
| H | -1.59148200 | 4.25358900  | -2.06063000 |
| H | 2.19184700  | 1.72645400  | -2.39155700 |
| H | 3.41283200  | 1.32702600  | 0.99039000  |
| H | 1.85106700  | 1.42812400  | 1.77759200  |
| H | 2.73791500  | 2.89519800  | 1.40145600  |
| H | -3.02845200 | 0.09338800  | -0.66215800 |
| H | -4.66133400 | -1.36535400 | -1.62492100 |
| H | -4.95302500 | -1.69643300 | 0.07005200  |
| H | -2.09329800 | -1.32736500 | -2.19100500 |
| H | -0.95508600 | -1.33370900 | -1.06453000 |
| H | -1.64220600 | -3.43676500 | -0.25394200 |
| H | -1.79817300 | -3.58036100 | -1.99713700 |
| H | -3.93340900 | -3.82298800 | -0.07820500 |
| H | 2.05203500  | -0.56528400 | -2.45740200 |
| H | 1.14076700  | -1.48145700 | 1.02240300  |
| H | 4.30737400  | -1.21051300 | -1.81958600 |
| H | 2.58900000  | -2.79368100 | 2.50812100  |
| H | 5.74858000  | -2.52847800 | -0.34137400 |

Structure of E1:

|   |             |             |             |
|---|-------------|-------------|-------------|
| C | 0.96847900  | 3.21408900  | -1.45702800 |
| N | 1.46981400  | 2.36464100  | -0.37647800 |
| C | 0.62475400  | 2.46815100  | 0.80414800  |
| C | -0.35974500 | 3.60852600  | 0.47949400  |
| C | -0.45953500 | 3.55634800  | -1.04378000 |
| C | -0.14388300 | 1.18730900  | 1.12959200  |
| O | -0.74471000 | 1.05368300  | 2.15310300  |
| N | -0.17751300 | 0.22643200  | 0.13647500  |
| C | 2.85801200  | 2.14300100  | -0.28978100 |
| C | 3.68532200  | 2.38400100  | -1.29870800 |
| C | 3.37457800  | 1.58072300  | 1.01233600  |
| N | -0.63494400 | -1.03431500 | 0.45321300  |
| C | -1.85611800 | -1.41379000 | 0.06912600  |
| O | -2.30867200 | -2.51883300 | 0.24812600  |
| C | -2.75005300 | -0.38530700 | -0.63919700 |
| C | -3.48161200 | 0.56838600  | 0.33593600  |

|   |             |             |             |
|---|-------------|-------------|-------------|
| N | -3.86182500 | -1.19632000 | -1.26983300 |
| C | 0.23313500  | -1.92512100 | 1.23664800  |
| C | -4.84849500 | -0.08375200 | 0.56127400  |
| C | -5.18892800 | -0.65534400 | -0.80572900 |
| C | 1.46889800  | -2.36099600 | 0.47722300  |
| C | 2.71485200  | -2.29103700 | 1.08240900  |
| C | 1.37338300  | -2.88708800 | -0.80783000 |
| C | 3.84988700  | -2.73165400 | 0.41649800  |
| C | 2.50404600  | -3.31938700 | -1.47662200 |
| C | 3.74732300  | -3.24128900 | -0.86504200 |
| H | 4.62519500  | -3.58088800 | -1.38349900 |
| H | -5.91375600 | -1.45497300 | -0.81017500 |
| H | 0.56805500  | 0.24811900  | -0.52904000 |
| H | 4.73083900  | 2.16742700  | -1.19728100 |
| H | 1.17577100  | 2.69730800  | 1.70379000  |
| H | 0.08670900  | 4.54660600  | 0.78809000  |
| H | -1.30264600 | 3.50583900  | 1.00001600  |
| H | 1.01870500  | 2.69835100  | -2.40873700 |
| H | 1.57178200  | 4.11425700  | -1.53907400 |
| H | -1.14570500 | 2.77414700  | -1.35845700 |
| H | -0.80086700 | 4.48688500  | -1.47905900 |
| H | 3.37077800  | 2.78786700  | -2.24097900 |
| H | 4.40141600  | 1.26608500  | 0.89418300  |
| H | 2.80065300  | 0.71954800  | 1.33719500  |
| H | 3.34476500  | 2.31877500  | 1.80757600  |
| H | -2.21654300 | 0.13643000  | -1.41520700 |
| H | -3.59867600 | 1.53680600  | -0.13587500 |
| H | -2.92397800 | 0.70525400  | 1.24955200  |
| H | -3.79113200 | -1.22898000 | -2.27388400 |
| H | -3.72958300 | -2.14495900 | -0.92124400 |
| H | 0.50035500  | -1.39910200 | 2.14234700  |
| H | -0.37079000 | -2.77503400 | 1.51142400  |
| H | -4.78353100 | -0.87787600 | 1.29605300  |
| H | -5.59561800 | 0.62324100  | 0.89458600  |
| H | -5.49110900 | 0.11235600  | -1.50359600 |
| H | 2.80473900  | -1.90151300 | 2.08155100  |
| H | 0.41117100  | -2.97769200 | -1.28157100 |
| H | 4.80806800  | -2.67454900 | 0.89993800  |
| H | 2.41745800  | -3.72621800 | -2.46788600 |

Structure of E2:

|   |             |             |             |
|---|-------------|-------------|-------------|
| C | -3.98337900 | -0.51795100 | -0.64124600 |
| N | -2.87961700 | 0.23720900  | -0.04833800 |
| C | -2.08129000 | -0.61370700 | 0.82507600  |



|   |             |             |             |
|---|-------------|-------------|-------------|
| C | -2.80260600 | -1.97866300 | 0.81397800  |
| C | -3.54654900 | -1.97266100 | -0.52023300 |
| C | -0.64426600 | -0.78069900 | 0.35006400  |
| O | 0.21860700  | -1.24938000 | 1.03926300  |
| N | -0.39258900 | -0.42697800 | -0.94831400 |
| C | -3.06779700 | 1.60537200  | 0.22606300  |
| C | -4.11211900 | 2.29234900  | -0.21933400 |
| C | -1.97631000 | 2.28828000  | 1.01631700  |
| N | 0.90220500  | -0.49193200 | -1.38553600 |
| C | 1.82219500  | 0.33350500  | -0.84670900 |
| O | 1.58605000  | 1.38051600  | -0.31703200 |
| C | 3.27195800  | -0.14619800 | -0.95696400 |
| C | 3.60358900  | -1.26104900 | 0.06253000  |
| N | 4.12531600  | 1.02381300  | -0.53492100 |
| C | 4.13128600  | -0.50163800 | 1.28190400  |
| C | 4.95457000  | 0.61844900  | 0.66357100  |
| H | 1.18934400  | -1.40344500 | -1.67017400 |
| H | 5.10646900  | 1.48472600  | 1.28867000  |
| H | -1.02241700 | 0.16087400  | -1.44650200 |
| H | -4.18275700 | 3.34506900  | -0.02555200 |
| H | -2.00589300 | -0.23910600 | 1.83572200  |
| H | -3.51080100 | -1.99993900 | 1.63411600  |
| H | -2.12143900 | -2.80910700 | 0.94508900  |
| H | -4.14853200 | -0.20798800 | -1.66577700 |
| H | -4.90470600 | -0.34587100 | -0.08971600 |
| H | -2.88116100 | -2.24161300 | -1.33473700 |
| H | -4.38492600 | -2.65717500 | -0.53765000 |
| H | -4.91217400 | 1.85665400  | -0.78454000 |
| H | -2.14304200 | 3.35622300  | 1.02259300  |
| H | -0.99440900 | 2.10554600  | 0.59165800  |
| H | -1.95676200 | 1.95596900  | 2.04938000  |
| H | 3.51635500  | -0.41330300 | -1.97517800 |
| H | 4.36751100  | -1.91071100 | -0.34753700 |
| H | 2.73202800  | -1.85396400 | 0.29862100  |
| H | 4.69385600  | 1.37694900  | -1.28778200 |
| H | 3.47161800  | 1.76047500  | -0.27583200 |
| H | 3.31141400  | -0.09957600 | 1.86507800  |
| H | 4.73400500  | -1.12352500 | 1.92913000  |
| H | 5.90627000  | 0.26662400  | 0.29274100  |

The resulting energies (in atomic unit) of the enamine intermediates and the transition states by various methods, as well as the thermal corrections obtained by the harmonic vibrational frequency analysis:

| HF/6-31G* | B3LYP/6-31G* | B3LYP/6-31G* | B3LYP/6-311+G** | ZPE | H | Gibbs | S |
|-----------|--------------|--------------|-----------------|-----|---|-------|---|
|-----------|--------------|--------------|-----------------|-----|---|-------|---|

|            | optimized   | sp gas phase | iefpcm (toluene) | iefpcm (toluene) | corr.   | corr.   | Corr.   | cal/mol·K |
|------------|-------------|--------------|------------------|------------------|---------|---------|---------|-----------|
| <b>E1</b>  | -1141.55920 | -1148.80456  | -1148.83395      | -1149.14953      | 0.51739 | 0.54155 | 0.46059 | 170.39    |
| <b>TS1</b> | -1484.97009 | -1494.38182  | -1494.39981      | -1494.80578      | 0.63843 | 0.66861 | 0.57527 | 196.46    |
| <b>TS2</b> | -1484.96375 | -1494.37592  | -1494.39506      | -1494.80070      | 0.63841 | 0.66854 | 0.57553 | 195.76    |
| <b>E2</b>  | -872.97962  | -878.43855   | -878.47927       | -878.73199       | 0.40005 | 0.41875 | 0.35201 | 140.48    |
| <b>TS3</b> | -1216.38764 | -1224.01414  | -1224.04175      | -1224.38634      | 0.52055 | 0.54543 | 0.46474 | 169.83    |
| <b>TS4</b> | -1216.38696 | -1224.01313  | -1224.04133      | -1224.38540      | 0.52092 | 0.54558 | 0.46584 | 167.84    |

Note: the single point energies in solvent contain the non-electrostatic contributions.

The resulting activation energies (in kcal/mol) with the thermal corrections:

|            | HF/6-31G* | B3LYP/6-31G* | B3LYP/6-31G*     | B3LYP/6-311+G**  | ZPE   | H     | Gibbs | S         | H    | G    |
|------------|-----------|--------------|------------------|------------------|-------|-------|-------|-----------|------|------|
|            | opt.      | sp gas phase | iefpcm (toluene) | iefpcm (toluene) | corr. | corr. | corr. | cal/mol·K | 298K | 298K |
| <b>TS1</b> | 14.2      | -3.9         | 3.6              | 8.0              | 1.7   | 1.2   | 16.8  | -52.2     | 9.2  | 24.8 |
| <b>TS2</b> | 18.2      | -0.2         | 6.6              | 11.2             | 1.7   | 1.2   | 16.9  | -52.9     | 12.4 | 28.1 |
| <b>TS3</b> | 16.0      | -2.9         | 5.7              | 9.2              | 1.4   | 1.0   | 15.5  | -48.9     | 10.2 | 24.8 |
| <b>TS4</b> | 16.4      | -2.3         | 6.0              | 9.8              | 1.6   | 1.1   | 16.2  | -50.9     | 10.9 | 26.0 |

Full reference 8 from paper b511992h:

All calculations were performed with the Gaussian03 program. M. J. Frisch, G. W. Trucks, H. B. Schlegel, G. E. Scuseria, M. A. Robb, J. R. Cheeseman, J. A. Montgomery, Jr., T. Vreven, K. N. Kudin, J. C. Burant, J. M. Millam, S. S. Iyengar, J. Tomasi, V. Barone, B. Mennucci, M. Cossi, G. Scalmani, N. Rega, G. A. Petersson, H. Nakatsuji, M. Hada, M. Ehara, K. Toyota, R. Fukuda, J. Hasegawa, M. Ishida, T. Nakajima, Y. Honda, O. Kitao, H. Nakai, M. Klene, X. Li, J. E. Knox, H. P. Hratchian, J. B. Cross, V. Bakken, C. Adamo, J. Jaramillo, R. Gomperts, R. F. Startmann, O. Yazyev, J. Austin, R. Cammi, C. Pomelli, J. Ochterski, P. Y. Ayala, K. Morokuma, G. A. Voth, P. Salvador, J. J. Dannenberg, V. G. Zakrzewski, S. Dapprich, A. D. Daniels, M. C. Strain, O. Farkas, D. K. Malick, A. D. Rabuck, K. Raghavachari, J. B. Foresman, J. V. Ortiz, Q. Cui, A. G. Baboul, S. Clifford, J. Cioslowski, B. B. Stefanov, G. Liu, A. Liashenko, P. Piskorski, I. Komaromi, R. L. Martin, D. J. Fox, T. Keith, M. A. Al-Laham, C. Y. Peng, A. Nanavakkara, M. Challacombe, P. M. W. Gill, B. G. Johnson, W. Chen, M. W. Wong, C. Gonzalez and J. A. Pople, GAUSSIAN 03 (Revision C.02), Gaussian, Inc., Wallingford, CT, 2004.
